1 **Comparative and Integrated Analysis of Plasma Extracellular Vesicles Isolations**

2 **Methods in Healthy Volunteers and Patients Following Myocardial Infarction**

3 **Short title:** Integrated Analysis of Plasma Extracellular Isolation Methods

4 Daan Paget<sup>1,2</sup>, Antonio Checa<sup>3</sup>, Benedikt Zöhrer<sup>4,5</sup>, Raphael Heilig<sup>6</sup>, Mayooran  
5 Shanmuganathan<sup>1,7</sup>, Raman Dhaliwal<sup>8</sup>, Errin Johnson<sup>8</sup>, Maléne Møller Jørgensen<sup>9,10</sup>, Rikke  
6 Bæk<sup>9</sup>, Oxford Acute Myocardial Infarction Study (OxAMI)<sup>1,7</sup>, Craig E. Wheelock<sup>3,5,11</sup>, Keith M.  
7 Channon<sup>1,7</sup>, Roman Fischer<sup>6</sup>, Daniel C. Anthony<sup>2</sup>, Robin P. Choudhury<sup>1,7</sup> and Naveed  
8 Akbar<sup>1</sup>.

9 <sup>1</sup> Division of Cardiovascular Medicine, Radcliffe Department of Medicine, University of  
10 Oxford, Oxford, United Kingdom.

11 <sup>2</sup> Department of Pharmacology, University of Oxford, Oxford, United Kingdom.

12 <sup>3</sup> Unit of Integrative Metabolomics, Institute of Environmental Medicine, Karolinska Institute,  
13 Stockholm, Sweden.

14 <sup>4</sup> Respiratory Medicine Unit, Department of Medicine Solna and Center for Molecular  
15 Medicine, Karolinska Institutet, Stockholm, Sweden.

16 <sup>5</sup> Department of Respiratory Medicine and Allergy, Karolinska University Hospital,  
17 Stockholm, Sweden.

18 <sup>6</sup> Target Discovery Institute, Centre for Medicines Discovery, Nuffield Department of  
19 Medicine, University of Oxford, Oxford, United Kingdom.

20 <sup>7</sup> Acute Vascular Imaging Centre, Radcliffe Department of Medicine, University of  
21 Oxford, United Kingdom.

22 <sup>8</sup> Sir William Dunn School of Pathology, University of Oxford, Oxford, United Kingdom.

23 <sup>9</sup> Department of Clinical Immunology, Aalborg University Hospital, Aalborg, Denmark.

24 <sup>10</sup> Department of Clinical Medicine, Aalborg University, Aalborg, Denmark.

25 <sup>11</sup> Gunma University Initiative for Advanced Research (GIAR), Gunma University, Showa-  
26 machi, Maebashi, Gunma, Japan.

27

28 **Word Count: 11,258**

29 **Number of Figures: 8**

30 **\*Corresponding Author:** Dr Naveed Akbar

31 **E-mail:** Naveed.Akbar@cardiov.ox.ac.uk

32 Telephone Number: 01865 234902

33 Address: Division of Cardiovascular Medicine, Radcliffe Department of Medicine, John  
34 Radcliffe Hospital, Level 6, West Wing, OX3 9DU, United Kingdom.

35

36

37 **Abstract**

38 Plasma extracellular vesicle (EV) number and composition are altered following myocardial  
39 infarction (MI), but to properly understand the significance of these changes it is essential to  
40 appreciate how the different isolation methods affect EV characteristics, proteome and  
41 sphingolipidome. Here, we compared plasma EV isolated from platelet-poor plasma from  
42 four healthy donors and six MI patients at presentation and 1-month post-MI using  
43 ultracentrifugation, polyethylene glycol precipitation, acoustic trapping, size-exclusion  
44 chromatography (SEC) or immunoaffinity capture. The isolated EV were evaluated by  
45 Nanoparticle Tracking Analysis, Western blot, transmission electron microscopy, an EV-  
46 protein array, untargeted proteomics (LC-MS/MS) and targeted sphingolipidomics (LC-  
47 MS/MS). The application of the five different plasma EV isolation methods in patients  
48 presenting with MI showed that the choice of plasma EV isolation method influenced the  
49 ability to distinguish elevations in plasma EV concentration following MI, enrichment of EV-  
50 cargo (EV-proteins and sphingolipidomics) and associations with the size of the infarct  
51 determined by cardiac magnetic resonance imaging 6 months-post-MI. Despite the selection  
52 bias imposed by each method, a core of EV associated proteins and lipids was detectable  
53 using all approaches. However, this study highlights how each isolation method comes with  
54 its own idiosyncrasies and makes the comparison of data acquired by different techniques in  
55 clinical studies problematic.

56

57 **Key words**

58 Ultracentrifugation, size exclusion chromatography, precipitation, acoustic trapping,  
59 immunoaffinity capture, plasma, omics, human.

60

61 **Introduction**

62 Plasma extracellular vesicles (EV) are increased in number and carry altered protein, lipid  
63 and RNA cargo in the peripheral blood in many pathologies [1-6]. Analysis of plasma EV by  
64 omics approaches may provide unparalleled insight into multiple disease mechanisms and  
65 disease monitoring in patients for personalized medicine. However, it is unclear how different  
66 plasma EV isolation methods influence the plasma EV-profile or the so-called 'EV-signature'  
67 in patients.

68

69 Current methods for the isolation of heterogeneous plasma EV include: ultracentrifugation  
70 (UC), density ultracentrifugation, field-flow fractionation, size-exclusion chromatography  
71 (SEC), precipitation, acoustic trapping [7] and immunoaffinity capture [8]. However,  
72 unsurprisingly, laborious protocols that yield pure EV from plasma are less well favoured in  
73 large cohorts [9, 10] than protocols that are easier, lower cost, and more convenient. These  
74 methodological predilections are further impacted by the availability of stored biobank  
75 plasma, which often carry contaminating erythrocytes, immune cells, and platelets [11].  
76 Irrespective of pre-storage processing, all plasma is a rich source of lipoproteins  
77 (apolipoprotein A and B), albumin, globulins and fibrinogens, which can co-isolate with  
78 plasma EV. The proportion of these cell-derived and non-cellular contaminants in the purified  
79 sample is method-dependent [12] and they may obscure EV associated cargo [13, 14].

80

81 Comparative isolation studies for plasma EV often assess EV size and concentration by  
82 Nanoparticle Tracking Analysis (NTA) and morphology by transmission electron microscopy  
83 (TEM). EV markers are usually evaluated using western blot or flow cytometry [15-18] .  
84 These standard analyses are often driven by the requirements of scientific bodies and  
85 consensus statements, which might be considered too prescriptive and refractory to change  
86 as our understanding of EV biology evolves [14]. However, additional assessments of how  
87 isolation methods influence the plasma EV preparation have been explored with a range of  
88 techniques, including proteomics [16, 18-21], profiling of cytokines [22], RNA integrity [23,

89 24], lipidomics [25], flow cytometry [15, 26] or a combination of these methods [16].  
90 However, the wide range of plasma EV isolation and characterization techniques has  
91 evolved largely in the absence of systematic method characterization comparisons. As a  
92 consequence, the absence of an understanding of the impact of isolation techniques has led  
93 to plenty of uncertainty in relation to the interpretation of EV discoveries in clinical samples.

94

95 Here, we used platelet-free plasma from the same healthy volunteers to compare five  
96 different plasma EV isolation methods including: UC, precipitation, acoustic trapping, SEC  
97 and immunoaffinity capture using tetraspanins CD9, CD63 and CD81 (**Figure 1**). We then  
98 sought to determine how plasma EV isolation methods influence EV characteristics in a set  
99 of clinically well characterised individuals. Acute myocardial infarction (MI) is an important  
100 pathology; it is also an example of sterile inflammation where plasma EV number and  
101 composition are acutely altered [5, 6]. Plasma EV from MI patients at two different time  
102 points were isolated using the five different EV isolation methods (**Figure 1**). Integrated  
103 unsupervised analysis of all the acquired characterization data from the five different  
104 methods was used to identify the similarities and differences between each method and to  
105 highlight how each technique might influence the protein and sphingolipid composition.

106 **Materials and Methods**

107 Healthy Volunteers and Acute Myocardial Infarction Patients.

108 All human investigations were conducted in accordance with the Declaration of Helsinki. The  
109 Oxfordshire Research Ethics Committee (Ref: 08/H0603/41 and 11/SC/0397) approved the  
110 human clinical protocols. All healthy volunteers and myocardial Infarction (MI) patients  
111 provided informed written consent for inclusion in the study.

112

113 Generation of Platelet Poor Plasma

114 Platelet-poor plasma was generated from healthy volunteers (N=4), patients presenting with  
115 MI (N=6) and from the same patients 1-month post-MI. 10-20 mL of whole blood was  
116 collected in EDTA (Greiner Bio-One, Stonehouse, United Kingdom) coated tubes and  
117 centrifuged at 1,000 x g for 25 minutes. The plasma was collected and centrifuged again for  
118 10 minutes at 5,000 x g to produce platelet-poor plasma. The platelet-poor plasma was  
119 stored in 500  $\mu$ L aliquots at -80 °C for future use.

120

121 Isolation of plasma EV using UC

122 Plasma aliquots were thawed at room temperature and EV were isolated by UC by  
123 transferring 500  $\mu$ L of platelet-poor plasma from healthy volunteers or 100  $\mu$ L from platelet-  
124 poor plasma from MI patients to a 13.2 mL QuickSeal tube (Beckman Coulter, California,  
125 United States). The tubes were filled with a 16 G hypodermic needles (Microlance, VWR,  
126 Pennsylvania, United States) fitted to a 10 mL syringe (VWR, Pennsylvania, United States)  
127 and after plasma was injected into the tube, 13 mL of phosphate buffered saline (PBS,  
128 Thermo Fischer Scientific, Massachusetts, United States) was added. The tubes were  
129 sealed using a soldering iron (Zacro, 60 W) and centrifuged using an Optima MAX-XP  
130 ultracentrifuge (Beckman Coulter, California, United States) at 120,000 x g for 120 minutes  
131 at 4 °C with a MLA55 fixed-angle rotor (Beckman Coulter, California, United States) [5, 6].  
132 The pelleted plasma EV were resuspended in 100  $\mu$ L PBS or RIPA buffer (Thermo Fischer  
133 Scientific, Massachusetts, United States) for subsequent analysis.

134

135 Isolation of plasma EV using precipitation

136 Plasma EV were isolated by precipitation by using the Total Exosome Isolation Kit  
137 (Invitrogen, Massachusetts, United States). 500  $\mu$ L of platelet-poor plasma from healthy  
138 volunteers or 100  $\mu$ L of platelet-poor plasma from MI patients was thawed at room  
139 temperature. After vortexing, 20-100  $\mu$ L of the Exosome Precipitation Reagent (Total  
140 Exosome Isolation Kit (for plasma), ThermoFisher Scientific, Massachusetts, United States)  
141 was added and mixed by repeated pipetting. Samples were incubated for 30 minutes on ice,  
142 the mixture was centrifuged at 10,000  $\times$   $g$  for 10 minutes by a Heraeus Fresco 17 benchtop  
143 centrifuge (ThermoFisher Scientific, *ibid*) at room temperature. The supernatant was  
144 removed and samples were centrifuged again at 2,000  $\times$   $g$  for 2 minutes to remove residual  
145 supernatant. The pelleted plasma EV were resuspended in 100  $\mu$ L PBS or RIPA buffer for  
146 downstream analysis by repeated pipetting.

147

148 Isolation of plasma EV using acoustic trapping

149 Acoustic trapping of plasma for the isolation of EV was achieved by diluting plasma 1:1 with  
150 PBS as previously described [18]. Briefly, samples were loaded onto a Costar 96-well plate  
151 (Corning, New York, United States) and inserted in the AcouSort device (Version 2.0)  
152 (AcouSort AB, Lund, Sweden). Acoustic waves were produced by a waveform generator  
153 (Keysight 33210A, Keysight, California, United States) with a 9.2 V output and were directed  
154 into a borosilicate capillary acoustic trapping unit (AcouSort AB, Lund, Sweden). Following  
155 activation of the waveform generator and the acoustic trapping unit was initialised, 50  $\mu$ L of  
156 12  $\mu$ m polystyrene beads (AcouSort AB, Lund, Sweden) were loaded into the acoustic  
157 trapping unit using a syringe pump (Tricontinent C2400 (Tricontinent, Fürstfeldbruck,  
158 Germany) set to 50  $\mu$ L/min. Each run consisted of 100  $\mu$ L of 1:1 diluted plasma and were  
159 loaded with a syringe pump speed of 20  $\mu$ L/min. After acoustic trapping, the samples were  
160 washed by aspirating 15  $\mu$ L of PBS at 20  $\mu$ L/min and dispensing 50  $\mu$ L at 20  $\mu$ L/min. After  
161 the PBS wash, the samples were eluted in 50  $\mu$ L of PBS and used for downstream analysis.

162

163 Isolation of plasma EV using size exclusion chromatography

164 Size exclusion chromatography (SEC) isolation of plasma EV was achieved by using the  
165 Exo-spin™ 96 (Cell Guidance Systems, Missouri, United States) [27]. Columns were  
166 equilibrated at room temperature for 15 minutes prior use. Afterwards, the columns were  
167 washed twice with 250 µL of PBS. Plasma was thawed at room temperature and 100 µL of  
168 plasma from healthy volunteers or MI patients was loaded into each column. Plasma EV  
169 were eluted by adding 200 µL of PBS to the top of the column eluted under gravity. Plasma  
170 EV were collected and stored for subsequent analysis.

171

172 Isolation of plasma EV using immunoaffinity capture

173 Prior to isolation, the plasma was passed through a SEC method as described above.  
174 Exosome-Human CD9 Isolation Reagent, Exosome-Human CD63 Isolation/Detection  
175 Reagent and Exosome-Human CD81 Isolation Reagent (all Invitrogen, Massachusetts,  
176 United States) were used to capture plasma EV. The mixture was created by resuspending  
177 each bead solution and mixing by repeated pipetting. Control IgG-isotype (10400C, Thermo  
178 Fischer Scientific, Massachusetts, United States) matched beads were conjugated according  
179 to the instructions of the Dynabeads Antibody Coupling Kit (Invitrogen, Massachusetts,  
180 United States). After SEC pre-isolation, the samples were incubated with 80 µL of the  
181 combined CD9, CD63 and CD81 beads (end concentration  $1 \times 10^7$  / mL, equal quantity of  
182 each bead mixture) or equally concentrated IgG control beads at 4 °C for 18 hours under  
183 continual rotation by a vertical rotor (Grant Bio, Essex, United Kingdom). After incubation,  
184 the beads were pelleted for 5 minutes at room temperature using a Dynal Magnet  
185 (Invitrogen, Massachusetts, United States) and the supernatant was collected for  
186 subsequent analysis. Following pelleting, the samples were washed three times with 200 µL  
187 of PBS and magnetic beads were pelleted as described above. Following the washes, the  
188 beads were resuspended in RIPA buffer and supernatant was separated by using a 2,000 x  
189 g spin and collected for subsequent analysis.

190

191

### 192 Nanoparticle Tracking Analysis

193 Plasma EV size distribution and concentration were determined by Nanoparticle Tracking  
194 Analysis (NTA) using a Zetaview device (Particle Metrix, Inning am Ammersee, Germany) as  
195 previously described [5, 6]. Prior to injection into the sample chamber, samples were diluted  
196 in PBS. The Zetaview measured the sample chamber from 11 positions in 2 cycles. The  
197 settings were set at sensitivity 80, fame 30 and shutter speed 100. Silica 100-nm  
198 microspheres (Polysciences Inc., Philadelphia, United States) were used to quality check the  
199 instrument performance routinely. The particle concentration per method was calculated as  
200 the change ( $\Delta$ ) compared to the the control sample, in which PBS replaced the plasma  
201 sample.

202

### 203 Protein concentration

204 Protein concentration was determined by bicinchoninic assay (BCA) (Thermo Fischer  
205 Scientific, Massachusetts, United States). A standard curve with Bovine Serum Albumin  
206 (Thermo Fischer Scientific, Massachusetts, United States) was used to calculate the protein  
207 concentration. Isolated EV were diluted 1:2 or 1:6 with RIPA buffer and needle sonicated by  
208 a SonoPuls HD2070 (Bandelin, Berlin, Germany) at 40% power for 10 seconds. 25  $\mu$ L of  
209 sonicated sample or standard was incubated in duplicate with 175  $\mu$ L of a 25:1 ratio between  
210 Reagent A and Reagent B (Thermo Fischer Scientific, Massachusetts, United States) and  
211 incubated at 37 °C for 30 minutes. After incubation, absorbance was measured at 562 nm  
212 using a plate reader (FLUOstar Omega plate reader, BMG Labtech, Aylesbury, United  
213 Kingdom).

214

### 215 Transmission Electron Microscopy

216 Transmission electron microscopy (TEM) of the isolated EV was conducted as previously  
217 described [6]. Briefly, grids (300 mesh Cu carbon film) were glow discharged for 20 seconds



218 at 15 mA (Leica EM ACE 200). The isolated plasma EV samples were added to the grid for 2  
219 minutes, blotted, stained with 2% uranyl acetate for 20 seconds, blotted and allowed to air  
220 dry. Images were acquired on a 120 kV Tecnai 12 TEM (Thermo Fischer Scientific,  
221 Massachusetts, United States) equipped with a OneView digital camera (Gatan, California,  
222 United States). TEM images of control samples, in which the isolation method was run with  
223 PBS in the place of the plasma, were obtained for each method. Immunoaffinity-based  
224 isolated EV were fixed with 1.6% glutaraldehyde in PBS for 1 hour at 4 °C. Following  
225 fixation, the beads were fixed in 4% agarose with PBS. The agarose was cut into small  
226 cubes (1-2 mm<sup>3</sup>). Sections were collected onto 200 mesh Cu grids and imaged using a  
227 Gatan OneView camera with a FEI Tecnai 12 TEM at 120kV.

228

### 229 Proteomics

230 Isolated plasma EV were processed for proteomics as previously described [28, 29]. In  
231 short, the samples were reduced in 5 mM dithiothreitol for 30 minutes at room temperature.  
232 Subsequently, the samples were alkylated with 20 mM iodoacetamide for 30 minutes and  
233 precipitation using chloroform-methanol precipitation. Quantified protein groups with  $\geq 2$   
234 unique peptides were included in the comparison of proteomes. The LFQ values for each  
235 protein group was deducted by the LFQ from control samples per isolation method. Protein  
236 abundance was normalised by Log-transformation. Gene Ontology (GO) analysis of the  
237 protein groups [30] was conducted by using Genontology.org [30] and the data were  
238 extracted on 19-07-2021. P-values were corrected for false discovery rate (FDR) and  
239 significance was set at  $p < 0.05$ . Fisher exact tests were conducted using R on published  
240 databases EVpedia [31], Vesiclepedia [32] and Exocarta [33].

241

### 242 EV-Array

243 Isolated plasma EV were analysed by a targeted EV-Array, which has been described  
244 previously [6, 34]. In short, a protein microarray plate was generated with the following  
245 antibodies: CD146 (P1H12), Flotillin-1, TSG101 (Abnova, Taiwan), CD9, CD81 (AnCell

246 corporation, Minnesota, United States); CD16 (3G8, BD Biosciences, California, United  
247 States); Alix (3A9), VEGFR2 (7D4-6; Biolegend, California, United States); CD63 (Bio-Rad,  
248 California, United States); ICAM-1 (R6.5, eBioscience, California, United States); Endoglin  
249 (LSbio, Washington, United States); Tissue factor (323,514), VCAM-1 (HAE-2Z),  
250 Thrombomodulin (501733), CD31 (AF806, R&D Systems, Minnesota, United States), VE-  
251 Cadherin (AF938, R&D Systems, Minnesota, United States). After blocking with the blocking  
252 buffer (50 mM ethanolamine, 100 mM Tris, 0.1% SDS, pH 9.0) for 30 minutes, the wells  
253 were emptied, and the plate was dried for 5 hours and sealed. The samples were incubated  
254 in the antibody coated microarray plate overnight at 2-8 °C. Following a wash, each well was  
255 incubated with a 100 µL of a detection antibody cocktail (biotinylated anti-human-CD9, -  
256 CD63 and -CD81 (Ansell, Minnesota, United States). After another wash, 100 µL  
257 streptavidin-Cy3 Life Technologies, Massachusetts, United States) diluted 1:3,000 was  
258 added to each well and incubated for 30 minutes. The plate was scanned using a  
259 sciREADER FL2 microarray scanner (Scienion AG, Berlin, Germany), at 535 nm and an  
260 exposure time of 2,000 milliseconds. For each protein the control, PBS sample value was  
261 subtracted from the result.

262

### 263 Western blot

264 Isolated plasma EV or controls were lysed using RIPA buffer with protease and phosphatase  
265 inhibitors PhosSTOP (Roche, Basel, Switzerland) and cOmplete (Roche, Basel, Switzerland)  
266 and were needle sonicated by a SonoPuls HD2070 (Bandelin, Berlin, Germany) at 40%  
267 power for 10 seconds as previously described [5, 6]. Following sonication, samples were  
268 incubated at 95 °C for 5 minutes to reduce. 8 µg of protein was combined with NuPage LDS  
269 sample buffer (4x) agent (Invitrogen, Massachusetts, United States). The samples were  
270 loaded onto a 4-12% bis-tris gradient gel (NuPAGE 4-12% Bis-Tris Protein Gel; 1.5 mm  
271 (ThermoFisher Scientific, Massachusetts, United States) with Amersham ECL Full Range  
272 ladder (Cytiva Life Sciences, Massachusetts, United States). Separated samples were  
273 transferred to a nitrocellulose membrane (Amersham Proton 0.2 µm, GE Healthcare, Illinois,

274 United States) and blocked for non-specific binding in 5 % skimmed milk powder (Marvel  
275 Original, New York, United States) in 0.5% PBS-tween 20 (Sigma-Aldrich, Missouri, United  
276 States) for 1 hour. Membranes were incubated with primary antibodies overnight: ALIX  
277 (ab117600, Abcam, Cambridge, United Kingdom) (1/1,000 dilution), CD63 (EXOAB-KIT-1,  
278 System Biosciences, California, United States) (1/1,000 dilution), ApoB (Ab139401, Abcam,  
279 Cambridge, United Kingdom) (1/20,000 dilution), albumin (MAB1455, R&D Systems,  
280 Minneapolis, Canada) (1/8,000 dilution), ApoA-I (Mab36641, R&D systems, Minneapolis,  
281 Canada) (1/8,000 dilution) and H3 (D1H2, Cell Signalling Technology, Massachusetts,  
282 United States) (1/1,000 dilution) 5 % milk in PBS-tween (PBS-T). Membranes were washed  
283 three times with PBS-T and incubated with secondary-horse radish peroxidase (HRP)  
284 conjugated antibodies (1/20,000  $\alpha$ -mouse W402B or 1/50,000  $\alpha$ -rabbit W401B, Promega,  
285 Wisconsin, United States) for 1 hour. The membranes were washed once again with PBS-T  
286 before incubating them with enhance chemiluminescence substrate (Pierce ECL,  
287 ThermoFisher Scientific, Massachusetts, United States) for imaging (Bio-Rad ChemiDoc MP  
288 Imaging system, California, United States).

289

### 290 Sphingolipidomics

291 Sphingolipids were determined as previously described [35]. 25  $\mu$ L of each sample were  
292 combined with 10  $\mu$ L solution containing labelled sphingolipid internal standards in LC-MS  
293 Methanol (Honeywell, North Carolina, United States) was added to each sample. This was  
294 followed by the addition of 100  $\mu$ L of methanol to each sample. Samples were then vortexed  
295 for 30 seconds and sonicated for 15 minutes in a Fisherbrand Ultrasound bath S60 (Fischer-  
296 Scientific, Massachusetts, United States) with ice. Next, samples were centrifuged at 12,000  
297 x g during 15 minutes at 6°C. Finally, 80  $\mu$ L of the supernatant were transferred to an LC-  
298 MS amber vial (Waters, Wilmslow, United Kingdom) equipped with a 150  $\mu$ L insert. Samples  
299 were randomized by time point of the individual within an extraction method. Samples were  
300 analyzed on an Acquity UPLC coupled to a Xevo TQ-S Mass Spectrometer (Waters,  
301 Wilmslow, United Kingdom) as previously described.

302

303 Bioinformatics and Integrated analysis

304 Integrated analysis was conducted by combining data from the NTA, protein concentration,  
305 EV-Array, proteomic and sphingolipidomic analysis. The data was normalized per row and  
306 log transformed. Following data normalization, a principal component analysis was  
307 conducted in R 4.0.0 [37] using the *factoextra* [38] and *FactoMineR* [39] packages. For  
308 visualization *ggplot2* [40] was used. Each of the principal components were then used to  
309 create a heatmap by extracting the values from the eigenvalues for each of the principal  
310 components and processing them in *pheatmap* [41]. The data was clustered by using double  
311 hierarchical clustering using the *pheatmap* R package.

312

313 Data availability

314 All data produced in the present study are available upon reasonable request to the  
315 Corresponding Author.

316

317 Statistical analysis

318 Data was plotted as mean with standard deviation. Normality of the data was confirmed  
319 using QQ plot and D'Agostino-Pearson normality test. For paired analysis, at the two time  
320 points, or for two independent groups, paired or unpaired Students T-test were used  
321 respectively (GraphPad Prism 9). Correlation analysis was carried out using linear Pearson  
322 regression analysis (Graphpad Prism 9). One-way ANOVA with Bonferroni correction post-  
323 hoc tests were used for analyses with >3 independent groups. The proteomic and lipidomic  
324 data was analyzed using a Kruskal-Wallis statistical test with Bonferroni post-hoc tests. p  
325 values <0.05 were considered significant.

## 326 **Results**

### 327 Plasma EV number and size is influenced by the isolation method

328 The concentration of isolated EV (expressed as delta over a matched PBS or and IgG  
329 control sample) determined by NTA differed per method (UC  $9.5 \times 10^9 \pm 1.8 \times 10^9$  EV / mL,  
330 precipitation  $6.1 \times 10^{11} \pm 2.7 \times 10^{11}$  EV / mL, acoustic trapping  $6.4 \times 10^9 \pm 2.8 \times 10^9$  EV / mL,  
331 SEC  $5.5 \times 10^9 \pm 1.9 \times 10^9$  EV / mL and immunoaffinity  $2.8 \times 10^{10} \pm 7.1 \times 10^9$  EV / mL, **Figure**  
332 **2A**). In agreement with previously published studies, precipitation yielded significantly higher  
333 numbers of particles / mL compared to UC [15, 36] and SEC [15, 37] (both  $p < 0.01$ ). Plasma  
334 EV number, isolated by precipitation, were also higher than the concentration acquired by  
335 acoustic trapping or by immunoaffinity capture (both  $p < 0.01$ ) (**Figure 2A**). The size and  
336 concentration distribution for each biological replicate exhibited uniformity within each  
337 isolation method and the different isolation methods did give a similar size distribution profile  
338 overall, which ranged from 15 nm (**Figure 2B**). However, the mean size of EV isolated by  
339 UC was significantly higher compared to the other methods (UC  $143.7 \pm 3.4$  nm, versus  
340 precipitation  $94.2 \pm 3.9$  nm, acoustic trapping  $81.2 \pm 3.9$  and SEC  $87.2 \pm 1.5$ ,  $p < 0.01$  all)  
341 (**Table 1**).

342

### 343 Plasma EV protein concentration

344 The protein concentration (expressed as the change over a matched PBS or and IgG  
345 control) also differed across the EV isolation methods: UC  $982 \pm 113$   $\mu\text{g}$  / mL, precipitation  
346  $9,478 \pm 3,174$   $\mu\text{g}$  / mL, acoustic trapping  $1,211 \pm 141$   $\mu\text{g}$  / mL, SEC  $382 \pm 51$   $\mu\text{g}$  / mL and  
347 immunoaffinity  $33 \pm 12$   $\mu\text{g}$  / mL (**Figure 2C**). EV generated by precipitation had a  
348 significantly higher protein concentration compared to UC, acoustic trapping, SEC or  
349 immunoaffinity (all  $p < 0.01$ , **Figure 2C**). The purity of EV isolation can be estimated by  
350 calculating a ratio of EV number (EV / mL) to protein concentration ( $\mu\text{g}$  / mL) [44]. The EV  
351 purity ratio differed between isolation method: UC  $9.0 \times 10^6 \pm 1.4 \times 10^6$ ; precipitation  $4.7 \times$   
352  $10^8 \pm 1.5 \times 10^8$ ; acoustic trapping  $2.1 \times 10^7 \pm 7.6 \times 10^6$ ; SEC  $6.8 \times 10^6 \pm 4.0 \times 10^6$  and  
353 immunoaffinity capture  $3.1 \times 10^8 \pm 1.0 \times 10^8$ . Both the immunoaffinity and precipitation

354 methods achieved a significantly higher EV purity ratio when compared to UC, SEC or  
355 acoustic trapping ( $p < 0.01$  compared to all methods) (**Supplemental Figure 1**).

356

#### 357 Plasma EV protein characterisation by Western blot

358 As NTA is unable to distinguish between plasma EV and similarly sized protein aggregates  
359 and lipoproteins, we analysed the isolated plasma EV obtained from each method for a  
360 number of markers by western blotting. ALIX and CD63 were included as the EV markers.  
361 For the plasma lipoprotein contaminants, we measured ApoB and ApoA-I. Histone H3 for  
362 cellular contaminant by western blot and albumin was also included in the set. Each isolation  
363 method showed the presence of EV markers ALIX and CD63 (**Figure 2D**). Apolipoproteins  
364 (ApoA-I and ApoB) were also present in all isolation methods. All methods were negative for  
365 markers of cellular contamination by histone H3. Surprisingly, the IgG isotype control for  
366 immunoaffinity capture using CD9, CD63 and CD81 also showed the presence of EV  
367 markers ALIX, CD63 and ApoB, albumin, ApoA-I but histone H3 was absent (**Figure 2D**).

368

#### 369 Plasma EV morphology by TEM

370 To determine the morphology of isolated plasma EV, we undertook TEM for the five different  
371 plasma EV isolation methods versus a matched PBS control or an IgG control for  
372 immunoaffinity capture beads. TEM analysis showed EV-like particles for each isolation  
373 method and an absence of EV-like particles in their respective PBS isolation controls  
374 (**Figure 2E-H**). Immunoaffinity beads CD9, CD63 and CD81 were embedded in agar and  
375 sectioned to visualise the bead surface for EV-like structures versus the IgG control. IgG  
376 control showed no EV-like particles present (**Figure 2I**). Immunoaffinity capture using CD9,  
377 CD63 and CD81 beads showed intact EV-like particles captured on the bead surface  
378 (**Figure 2J**).

379

#### 380 Plasma EV compositional analysis using a high throughput protein EV-Array

381 The results detailed above provide evidence for the relative success of each method to yield  
382 plasma EV and assessment of relative plasma EV purity [39]. However, these techniques do  
383 not readily distinguish the abundance of specific plasma EV populations carrying, for  
384 instance, specific cell-associated markers, or easily allow quantitative assessment of the  
385 abundance of contaminating lipoproteins. Thus, we probed the composition of the plasma  
386 EV isolated from each method for general EV markers CD9, CD63, CD81, ALIX, TSG101,  
387 Flotillin 1, Annexin V and a panel of 18 cell associated markers, which may distinguishes EV  
388 from platelets, endothelial cells, immune cells, muscle and lipoprotein contaminants  
389 apolipoprotein E (ApoE) and apolipoprotein H (ApoH) using a validated high throughput EV-  
390 protein antibody array (**Figure 3**) [34]. We utilised a matched PBS control for UC,  
391 precipitation, acoustic trapping and SEC and an IgG control for immunoaffinity capture. For  
392 the EV-associated proteins, CD9 and CD81, they were significantly higher in plasma EV  
393 isolated by UC compared to the other methods ( $p < 0.01$  for both). Annexin V was significantly  
394 higher in the acoustic trapping samples compared to SEC and immunoaffinity capture  
395 ( $p < 0.01$  and  $p < 0.05$ , respectively).

396

397 Hierarchical clustering of the EV-Array acquired data for the different isolation methods  
398 indicates that there are significant method-dependent differences for cell associated EV  
399 markers (**Figure 3**). CD31 was significantly higher in precipitation isolated plasma EV versus  
400 acoustic trapping ( $p < 0.05$ ). CD41 was significantly higher in UC isolated plasma EV  
401 compared to precipitation isolated EV ( $p < 0.05$ ) and CD16 content was significantly higher in  
402 the precipitation isolated plasma EV samples compared to SEC ( $p < 0.01$ ). There were no  
403 differences between immunoaffinity capture using CD9, CD63 and CD81 and IgG controls  
404 (**Figure 3**).

405

406

407 Unbiased proteomic analysis of plasma EV

408 We next determined the proteomic profile of each isolation method using unbiased LC-  
409 MS/MS versus their respective PBS or IgG controls for each method. The proteomic profile  
410 following plasma EV isolation showed a significantly higher number of quantified protein  
411 groups compared to their respective controls for all isolation methods, except immunoaffinity  
412 capture, which displayed similar results to the IgG control beads (UC  $p < 0.01$ , precipitation  
413  $p < 0.05$ , acoustic trapping  $p < 0.01$  and SEC  $p < 0.01$ , **Figure 4A**). The choice of plasma EV  
414 isolation method influenced the overall EV-proteome, but nine protein groups were common  
415 across all methods (**Supplemental Figure 2**). These were: immunoglobulin heavy constant  
416 gamma 1, alpha-2-macroglobulin, haptoglobin, immunoglobulin heavy constant  $\mu$ ,  
417 immunoglobulin kappa constant, serpin family A member 1, albumin, fibrinogen alpha chain  
418 and Apo-A1.

419

420 We used hierarchical clustering of the top 30 quantified protein groups across the different  
421 plasma EV isolation methods and found a distinct separation between isolation methods. UC  
422 and SEC isolated plasma EV clustered together and precipitation, acoustic trapping and  
423 immunoaffinity capture formed a distinct separate cluster (**Figure 4B**). Hierarchical clustering  
424 indicates that these differences between UC/SEC and precipitation, acoustic trapping and  
425 immunoaffinity capture were driven by an abundance of protein groups with common plasma  
426 proteins (ALB, A2M, ApoB, C3, TF, HP, Apo-A1, SERPINA1, CP and ITIH2), fibrinogens  
427 (FGG and FGB) and immunoglobulins (IGHG1, IGKC, IGHG3, IGHM, IGK, IGHG2).

428

429 To better understand the nature of the proteomic profile for each isolation method, we  
430 conducted unbiased Gene Ontology (GO) pathway analysis of the protein groups associated  
431 with each isolation method. All methods showed a significant association with EV pathways:  
432 Blood Microparticle GO: 0072562 and Extracellular Exosome GO:0070062 (all  $p < 0.01$ ,  
433 **Supplemental Figure 3A**). However, there was no clear separation between the different  
434 isolation methods using this pathway analysis approach. To further scrutinize the EV  
435 proteomic profile obtained per plasma EV isolation method we undertook a statistical



436 comparison using a Fisher's exact test with published EV-databases EVpedia [31],  
437 Vesiclepedia [32] and Exocarta [33]. This determined the similarity between plasma EV  
438 proteomic profiles obtained from the five different isolation methods to those published  
439 previously by showing the size of the intersect. There was a significant overlap between the  
440 five different isolation methods and the archived EV databases ( $p < 0.05$ , all methods,  
441 **Supplemental Figure 3B**). UC, SEC and immunoaffinity capture showed the greatest  
442 similarity with published databases. Whereas precipitation and acoustic trapping showed  
443 less similarity. Furthermore, we determined whether our plasma EV acquired proteomic  
444 profiles from the five different methods were similar to previously published plasma EV  
445 proteomic data for Exospin, SEC, ExoQuick, IZON35, IZON70, Optiprep and Exo-easy [16,  
446 17] and found a significant overlap for all five plasma EV isolation methods ( $p < 0.01$ )  
447 **(Supplemental Figure 4)**.

448

#### 449 Targeted sphingolipidomic of plasma EV

450 EV membranes are largely composed of lipids [46] and lipoproteins are a predominant  
451 contaminant in plasma EV samples [41], which are influenced by the choice of isolation  
452 method [12, 42]. We compared the lipidomic profile of the different plasma EV isolations  
453 methods by undertaking targeted sphingolipidomic analysis. The sphingolipidomic analysis  
454 showed a significantly higher number of sphingolipids compared to the respective controls  
455 for all isolation methods except immunoaffinity capture (UC  $p < 0.01$ , precipitation  $p < 0.05$ ,  
456 acoustic trapping  $p < 0.01$  and SEC  $p < 0.01$ , **Figure 5A**). However, there were distinct  
457 sphingolipidomic differences between the other methods. Eleven of the quantified  
458 sphingolipids were common to all methods, which were DhCer(d18:0/24:0), Cer(d18:1/22:0),  
459 Cer(d18:1/24:1), Cer(d18:1/24\_:0), SM(d18:1/16:0), SM(d18:1/18:0), SM(d18:1/24:1),  
460 SM(d18:1/24:0), HexCer(d18:1/16:0), HexCer(d18:1/24:1) and LacCer(d18:1/24:1)  
461 **(Supplemental Figure 5)**. Hierarchical clustering analysis of the sphingolipidomic profile for  
462 each of the isolation methods showed that there are three distinct clusters **(Figure 5B)**.  
463 Immunoaffinity capture and precipitation formed two separate individual clusters, whilst UC,

464 acoustic trapping and SEC clustered together. Hierarchical clustering indicates that these  
465 group differences were driven by an abundance of sphingomyelins (16:0, 18:0, 24:0 and  
466 24:1), ceramides (22:0, 24:0 and 24:1), hexosylceramides (24:1) and lactosylceramides  
467 (16:0) in the precipitation group and a lack of these sphingolipids in the immunoaffinity  
468 capture group.

469

#### 470 Integrated comparison of plasma EV isolation methods

471 These data shows that plasma EV isolation methods have divergent impact on the yield of  
472 EV, their purity, the type of EV isolated from plasma that are associated with a particular cell  
473 source and the overall proteomic and sphingolipidomic profile. To better understand how  
474 these individual method associated differences influenced the plasma profile, we undertook  
475 integrated analysis of all the different plasma EV isolation methods with all of the acquired  
476 data. This included the EV particle concentration, protein concentration, EV-protein array  
477 data, proteomic and sphingolipidomic data. To condense the multiple different variables, we  
478 converted the data into principal components. Principal component analysis with two  
479 components (PCA1 and PCA2) accounted for 47.2% of the variance and showed clear  
480 separation between the different isolation methods (**Figure 6A/B**). UC, SEC and  
481 precipitation form distinct clusters, whereas acoustic trapping and immunoaffinity capture  
482 clustered together. Specific principal component analysis indicated that the PCA1 is driven  
483 by proteomics acquired data and PCA2 is driven by sphingolipidomic data (**Supplementary**  
484 **Figure 6**). These integrated data show that the EV isolation method influences the omic and  
485 integrated-based plasma EV-profile, which may influence interpretation of EV-acquired data  
486 for clinical biomarker discovery and precision diagnostics.

487

#### 488 Plasma EV isolation methods influence the diagnostic potential of plasma EV from patients 489 following MI

490 We next determined whether the choice of plasma EV isolation method impacts the ability to  
491 detect changes in EV-profile in a disease state. We obtained plasma at time of presentation

492 with MI, but prior to percutaneous coronary intervention (PCI), and a matched control plasma  
493 sample was obtained at 1-month post-MI from the same patients. The clinical patient  
494 characteristics are detailed in **Table 2**.

495

496

497

#### 498 Plasma EV concentration in MI is influenced by the isolation method

499 To mitigate any potential variability in bio-banked plasma samples we used three technical  
500 plasma replicates per patient, per time point and per method. There were significantly more  
501 plasma EV at time of presentation with MI versus the 1 month control follow up when plasma  
502 EV were isolated by UC, precipitation and acoustic trapping ( $p < 0.05$  for all) (**Figure 7A**), but  
503 not by SEC and immunoaffinity capture (UC presentation:  $2.8 \times 10^9$  EV / mL vs. UC follow-  
504 up:  $2.1 \times 10^9$  EV / mL; precipitation presentation:  $1.5 \times 10^{12}$  EV / mL vs. precipitation follow-  
505 up:  $7.9 \times 10^{11}$  EV / mL; acoustic trapping presentation:  $4.3 \times 10^{10}$  EV / mL vs. acoustic  
506 trapping follow-up:  $1.9 \times 10^{10}$  EV / mL; SEC presentation:  $2.5 \times 10^{11}$  EV / mL vs. SEC follow-  
507 up:  $9.2 \times 10^{10}$  EV / mL and immunoaffinity presentation:  $2.0 \times 10^{11}$  EV / mL vs.  
508 immunoaffinity capture follow-up:  $9.8 \times 10^{10}$  EV / mL, **Figure 7A**). The technical variance  
509 between the three independent isolations from each patient, and at each time, point showed  
510 that SEC gave significantly less variance compared to UC ( $10.0 \pm 3.1$  % vs.  $22.7 \pm 13.0$  %,  $p < 0.01$ ) (**Supplemental Figure 7A**). The mean plasma EV size was similar between the  
511 time of presentation and 1 month follow up control for the five different plasma EV isolation  
512 methods (**Supplemental Figure 7B**) and the size and concentration distribution profile  
513 showed no distinct differences between time points or dependent on the plasma EV isolation  
514 method (**Supplemental Figure 7C**).

515

516  
517 The plasma EV isolation method influences plasma EV concentration association with infarct  
518 size

519 We have previously reported that the total concentration of plasma EV in the peripheral  
520 blood isolated by UC at the time of presentation correlates with the size of myocardial injury  
521 and scar, determined by late gadolinium enhanced (LGE) MRI 6 months post-MI [5, 6].  
522 Therefore, we determined whether plasma EV concentrations from the five different plasma  
523 EV isolation methods influenced the ability to determine this important clinical association.  
524 Infarct size at 6-months post-MI significantly correlated with the plasma EV concentration at  
525 time of presentation for UC samples ( $R^2 = 0.89$ ,  $p=0.02$ ), but not for precipitation, acoustic  
526 trapping, SEC or immunoaffinity capture ( $R^2=0.10$   $p=0.60$ ,  $R^2=0.16$   $p=0.50$ ,  $R^2=0.05$   $p=0.71$   
527 and  $R^2=0.10$ ,  $p=0.78$ , respectively) (**Figure 7B**).

528

#### 529 Cell associated plasma EV are not influenced by the isolation method in MI

530 We determined whether the isolation methods influenced cell associated plasma EV-  
531 markers in MI patients at presentation versus the respective 1 month follow up sample. The  
532 high through put EV-Array data was expressed as fold change over the matched follow-up  
533 control samples per patient. Plasma EV markers were increased at time of presentation vs.  
534 follow-up control (**Figure 7C**). However, the pattern of change in plasma EV-markers were  
535 not consistent across the different isolation methods (**Figure 7C**). Hierarchical clustering of  
536 the plasma EV marker response at the time of presentation with MI showed method-  
537 dependent clustering. Similarly, cell associated markers on plasma EV were differentially  
538 enriched following MI (**Figure 7C**). Once again, unbiased clustering showed method-  
539 dependent groupings. Together these data suggest that changes in plasma-EV protein are  
540 influenced by the choice of plasma EV isolation method following MI in isolation and when  
541 clustered together.

542

#### 543 Plasma EV sphingolipidomic profiles are altered following MI and influenced by the isolation 544 method

545 Next, we profiled EV-sphingolipids in the acute phase following MI (calculated as fold over  
546 matched follow-up control samples) using the different plasma EV isolation methods. Plasma

547 EV-sphingolipidomic profiles for samples generated by precipitation, acoustic trapping and  
548 SEC contained significantly more quantified lipid groups at time of presentation with MI  
549 versus samples obtained by UC and immunoaffinity capture ( $p < 0.01$ , all). We ranked plasma  
550 EV-lipid profiles based on their overall abundance of lipid groups and found that ceramides  
551 were significantly higher in the precipitation isolated plasma EV samples, followed by SEC,  
552 acoustic trapping, ultracentrifugation / immunoaffinity capture ( $p < 0.01$ ). Whereas the  
553 sphingomyelins were significantly higher in the precipitation group versus all other isolation  
554 methods ( $p < 0.001$ ) (**Figure 7D**). The clustered plasma EV-sphingolipid profile following MI  
555 was influenced by the choice of isolation method. Several ceramides and sphingomyelins  
556 were significantly higher in the plasma EV isolated by precipitation or acoustic trapping  
557 compared to UC (**Supplemental Figure 8**). In addition, the fold increase of Cer(d18:1/22:0),  
558 SM(d18:1/18:1) and sphinganine (d18:0) in plasma EV isolated by precipitation at time of  
559 presentation vs. 1-month follow up significantly correlated with the infarct size of the patients  
560 at 6-months post-MI ( $R^2 = 0.91$   $p = 0.01$ ,  $R^2 = 0.78$   $p = 0.05$  and  $R^2 = 0.78$   $p = 0.05$ , respectively)  
561 (**Supplemental Figure 9**). This result further confirmed that plasma EV isolation methods,  
562 using targeted sphingolipidomic methods, are associated with unique method dependent  
563 profiles in patients following MI.

564

#### 565 Integrated-omics comparison of plasma EV isolation methods in MI patients

566 Finally, we integrated all the acquired plasma EV data from the MI patients in the acute  
567 presentation and follow-up time points. A principal component analysis was constructed to  
568 assess if the plasma EV profile at time of presentation differed from follow-up using a 95%  
569 confidence level. Integrated analysis showed that plasma EV profiles were only  
570 distinguishable at time of presentation with MI for precipitation and acoustic trapping, but not  
571 for those plasma EV isolated by UC, SEC and immunoaffinity capture (**Figure 8**). These  
572 findings indicate that different plasma EV isolation methods influence the diagnostic potential  
573 of plasma liberated EV following MI when multiple datasets are integrated to determine  
574 plasma EV profiles for potential panel biomarker discovery.

575 **Discussion**

576 Plasma EV-cargo may provide unparalleled insight into tissue homeostasis and pathological  
577 processes to facilitate identification of patients for focused therapies, but the methods to  
578 isolate plasma EV may impact the EV characteristics. Here, we found that; (I) the choice of  
579 plasma EV isolation method affected the plasma EV concentration, sphingolipid and  
580 proteomic profile, (II) but the five different plasma EV isolation methods shared a common  
581 EV protein and sphingolipid profile. (III) Plasma EV isolation by immunoaffinity capture using  
582 anti-CD9, -CD63 and -CD81 coated antibody beads with the current protocol yields a similar  
583 profile to IgG control beads. (IV) The isolation method affected the ability to detect  
584 alterations in plasma EV sphingolipids and proteins in MI patients and (V) their association  
585 with infarct size determined by cardiac MRI 6 months post-MI. For example, the plasma EV  
586 concentration at time of presentation obtained using UC provides prognostic information, but  
587 this method is less suitable as a tool to generate EV with higher purity for use in mechanistic  
588 studies.

589

590 Previous studies have sought to determine the influence of plasma EV isolation methods,  
591 but have often focused on comparing the net influence on the EV-proteome [3, 16, 17, 43] or  
592 RNA profiles [16] after isolation. These approaches can neglect the increased dimensionality  
593 of EV components, which carry numerous biologically active molecules such as proteins,  
594 lipids, RNA/DNA and metabolites. Furthermore, there is varied assessment of  
595 contaminations in EV preparations for use in 'omics' studies, which may mask or skew the  
596 interpretation of datasets. The approach employed here utilizes the same independent  
597 biological replicates across multiple methods for plasma EV isolation and characterization, in  
598 conjunction with a control PBS/vehicle sample or an IgG for immunoaffinity capture beads.  
599 Here, the repeated analysis of the same plasma samples across multiple methods has  
600 enabled individual biological variability and potential plasma EV isolation irregularities to be  
601 explored. By using individual and integrated analysis, we showed that each method of  
602 plasma EV isolation was internally consistent; in so much that the samples clustered

603 according to their isolation method in unsupervised hierarchical clustering and principal  
604 component analysis of all the acquired data.

605

606 Consistent with previous reports, our plasma EV-proteome was dependent on the plasma  
607 EV isolation method [16, 17]. However, our data shows that there are common plasma  
608 proteins, such as albumin and apolipoproteins ApoA-I and ApoB, present in all five isolation  
609 methods tested, with significant similarities to archived EV-databases [31-33] and published  
610 studies [16, 17, 31]. In particular, the plasma EV-proteome indicated that UC/SEC cluster  
611 together based on the top 30 protein groups quantified, due to higher quantities of  
612 fibrinogens and immunoglobulins compared to the other methods. This is, potentially, a  
613 methodological constraint of employing untargeted mass spectrometry on plasma EV, which  
614 favors the most abundant peptides.

615

616 To better determine the protein profile of known plasma EV markers and cell associated  
617 markers, we utilized a high throughput EV-Array [50] following plasma EV isolation from the  
618 five different methods. We found that CD9 and CD81 were the most abundant in plasma EV  
619 derived by UC versus precipitation and SEC in healthy volunteers. Additionally, we found  
620 that cell-associated markers such as CD41 (platelets) and CD16 (immune cells) were  
621 enriched in UC and precipitation compared to other methods only in healthy volunteers. This  
622 high throughput antibody EV-Array circumvents issues of non-EV associated protein and  
623 lipid contaminants in plasma EV preparations. However, the five different plasma EV  
624 isolation methods used here may have influenced the EV-protein corona. Proteins such as  
625 albumin and apolipoproteins (ApoA-I, ApoB, ApoC-III and ApoE) show an association with  
626 the surface of EV [45], which may influence antibody mediated binding to the array or  
627 subsequent detection of EV-associated proteins in this sandwich ELISA like technique.  
628 Protein coronas found on EV are affected by the isolation method [45] and our data shows  
629 that the plasma EV-proteome and EV-Array acquired data are also influenced by the  
630 isolation method. Indeed, our western blot and proteomic data reported considerable

631 variation in the amount of albumin across the methods, which is a predominant protein in the  
632 EV protein corona. In particular, precipitation isolated preparations was associated with  
633 lower albumin, which could be due to the presence of PEG and high salt concentrations in  
634 the isolation buffer that might be expected to influence albumin associations with the EV  
635 protein corona. The temporal dynamics of the EV-protein and possibly EV-lipid corona are  
636 poorly understood, and further elucidation of these interactions will be essential to  
637 understand the data from these preparations.

638

639 Immunoaffinity based methods, such as magnetic and polystyrene bead conjugations to  
640 specific antibodies, such as tetraspanins (CD9, CD63 and CD81), have been heralded as an  
641 important advancement in the capture of highly pure EV populations from the plasma.  
642 Immunoaffinity based methods could circumvent issues of lipoprotein and protein  
643 contamination in plasma EV yields, which are common in methods that use EV physical  
644 characteristics such as size and density for isolation such as UC and SEC [16, 46]. To the  
645 best of our knowledge this is the first study to compare magnetic beads coated with  
646 antibodies for tetraspanins (CD9, CD63 and CD81) with a matched IgG control for plasma  
647 EV isolation, using detailed integrated analyses. The plasma EV-profile of proteins and lipids  
648 for the immunoaffinity beads and matched IgG control was similar by Western blot, EV-  
649 protein-array, the number of peptides groups in proteomic profiles, GO pathway analysis and  
650 targeted sphingolipidomics. TEM imaging of IgG beads showed no visible EV-like particles  
651 or membranous structures, indicative of whole or sheared EV-particles, captured to the bead  
652 surface. However, we hypothesize that soluble non-EV-associated proteins (such as C3,  
653 A2M, ALB and fibrinogens A and B) and lipids (such as ApoB, ApoE and ApoA-I) are  
654 interacting with IgG beads, which have become associated with EV-profiles in omics studies  
655 and in archived databases [31-33]. Studies using less complicated matrices, like conditioned  
656 cell culture media, show a more robust distinction between anti-CD9, CD63 and CD81 beads  
657 versus IgG control beads [8, 47], indicating that the similarity between tetraspanin and IgG  
658 antibody beads here might be matrix specific. Future plasma EV studies using antibody-



659 bead isolation should include a matched IgG control per characterisation when using omic-  
660 approaches

661

662 Having determined plasma EV isolations method similarities and differences on the EV-  
663 characteristics and cargo in healthy volunteers, we assessed the influence of plasma EV  
664 isolation methods in a clinical situation where plasma EV number and composition are  
665 altered. We have previously shown that plasma EV are altered following MI to mediate long  
666 range signalling and induce the mobilization of splenic-neutrophils, splenic-monocytes and  
667 orchestrate their transcriptional programming [5, 6]. The choice of plasma EV isolation  
668 method determined whether there was a higher concentration of EV immediately following  
669 MI compared to a 1-month follow-up control sample from the same patients. The new data  
670 here support our previous observations that the concentration of plasma EV isolated by UC  
671 from the time of presentation with MI correlates with the infarct size [5]. However, plasma EV  
672 concentrations derived from the other isolation methods in the same patients did not  
673 associate with infarct size. One possible explanation is the modest sample size utilised in  
674 this multi-method comparison (N=6), which is smaller than those utilised by us in previous  
675 publications (N=15-22) [5, 6].

676

677 Plasma EV sphingolipids are predictive of MI [3]. However, the influence of plasma EV  
678 isolation methods on the plasma EV-sphingolipidomic profile were not reported. We found a  
679 distinct sphingolipid profile between the plasma EV isolation methods. Precipitation-based  
680 EV isolation yields a significantly higher lipid content, principally due to higher proportions of  
681 sphingomyelins and ceramides. Sphingomyelins are found in cell membranes and  
682 associated with high- and low-density lipoproteins [48, 49]. The high presence of  
683 sphingomyelins and ceramide in the plasma EV profile of the precipitation-based method is  
684 likely due to the co-isolation of lipoproteins. PEG-based solutions co-isolate lipoproteins [56].  
685 Lipoproteins contain ApoA-I and ApoB, which were higher in plasma EV derived by  
686 precipitation-based isolation when compared to the other methods by Western blot.

687 Lipoproteins can also masquerade as EV-like particles in dynamic light scattering in  
688 techniques such as NTA [12]. Precipitation isolated plasma EV had the highest  
689 concentration of particles / mL when compared to other methods. EV Cer(d18:1/20:0) only  
690 showed elevation in precipitation-based isolation compared other methods. Similarly,  
691 precipitation isolated EV showed sphinganine(d18:0) correlated with infarct size at 6-months,  
692 but this was not the case for the other methods. Analysis of plasma EV-sphingolipid remains  
693 challenging due to constraints due to lipoparticle remnants [57]; however we show here for  
694 the first time there are common sphingolipids for different plasma EV isolation methods. In  
695 particular, plasma EV-protein and EV-sphingolipids clustered uniquely based on the isolation  
696 method, which may impact plasma EV diagnostics where a panel of proteins and  
697 sphingolipids are used for differentiation of clinical disease or outcome.

698

699 In summary, our data show that the choice of plasma EV isolation method influences the  
700 concentration of plasma EV, the EV-proteome and EV-sphingolipid profile in healthy  
701 volunteers and MI patients, where methodological differences determined associations with  
702 infarct size. Precipitation based plasma EV isolation gives the highest particle concentration  
703 and enriches for more sphingolipids, but co-isolate large quantities of apolipoproteins. In  
704 addition, immunoaffinity capture by using antibodies against tetraspanins yields similar EV-  
705 protein and EV-sphingolipid profiles to IgG control beads. Unbiased integrated analysis  
706 shows that plasma EV isolation methods cluster independently, but despite the selection  
707 predispositions imposed by each method, a core of EV associated proteins and lipids was  
708 detectable using all the approaches.

709 **Acknowledgments**

710 DP acknowledges his funding from the Department of Pharmacology, the Alison Brading  
711 Memorial Fund Lady Margaret Hall, the Clarendon Fund provided by the University of Oxford  
712 and the Medical Research Council (MR/N013468/1). NA and RC acknowledge support by  
713 research grants from the British Heart Foundation (BHF) Centre of Research Excellence,  
714 Oxford (NA and RC: RE/13/1/30181 and RE/18/3/34214); British Heart Foundation Project  
715 Grant (NA and RC: PG/18/53/33895); the Tripartite Immunometabolism Consortium, Novo  
716 Nordisk Foundation (RC: NNF15CC0018486); Oxford Biomedical Research Centre (BRC);  
717 Nuffield Benefaction for Medicine and the Wellcome Institutional Strategic Support Fund  
718 (ISSF) (NA) and a Health Research Bridging Salary Scheme (HRBSS) to N.A. BZ work was  
719 supported by funding from the European Union's Horizon 2020 Research and Innovation  
720 Program under Marie Skłodowska-Curie Grant Agreement 812890, ArthritisHeal. The views  
721 expressed are those of the author(s) and not necessarily those of the National Health  
722 Service, the National Institutes of Health Research or the Department of Health

723

724 **Declaration statement**

725 The Author(s) declare(s) that there is no conflict of interest.

726 **References**

- 727 1. de Miguel Pérez, D., et al., Extracellular vesicle-miRNAs as liquid biopsy biomarkers  
728 for disease identification and prognosis in metastatic colorectal cancer patients. *Sci Rep*,  
729 2020. 10(1): p. 3974.
- 730 2. Dong, L., et al., Circulating Long RNAs in Serum Extracellular Vesicles: Their  
731 Characterization and Potential Application as Biomarkers for Diagnosis of Colorectal Cancer.  
732 *Cancer Epidemiol Biomarkers Prev*, 2016. 25(7): p. 1158-66.
- 733 3. Burrello, J., et al., Sphingolipid composition of circulating extracellular vesicles after  
734 myocardial ischemia. *Sci Rep*, 2020. 10(1): p. 16182.
- 735 4. Kalani, M.Y.S., et al., Extracellular microRNAs in blood differentiate between  
736 ischaemic and haemorrhagic stroke subtypes. *J Extracell Vesicles*, 2020. 9(1): p. 1713540.
- 737 5. Akbar, N., et al., Endothelium-derived extracellular vesicles promote splenic  
738 monocyte mobilization in myocardial infarction. *JCI Insight*, 2017. 2(17).
- 739 6. Akbar, N., et al., Rapid neutrophil mobilisation by VCAM-1+ endothelial extracellular  
740 vesicles. *Cardiovasc Res*, 2022.
- 741 7. Evander, M., et al., Non-contact acoustic capture of microparticles from small plasma  
742 volumes. *Lab Chip*, 2015. 15(12): p. 2588-96.
- 743 8. Kowal, J., et al., Proteomic comparison defines novel markers to characterize  
744 heterogeneous populations of extracellular vesicle subtypes. *Proc Natl Acad Sci U S A*,  
745 2016. 113(8): p. E968-77.
- 746 9. Onódi, Z., et al., Isolation of High-Purity Extracellular Vesicles by the Combination of  
747 Iodixanol Density Gradient Ultracentrifugation and Bind-Elute Chromatography From Blood  
748 Plasma. *Front Physiol*, 2018. 9: p. 1479.
- 749 10. Nordin, J.Z., et al., Ultrafiltration with size-exclusion liquid chromatography for high  
750 yield isolation of extracellular vesicles preserving intact biophysical and functional properties.  
751 *Nanomedicine*, 2015. 11(4): p. 879-83.
- 752 11. Geyer, P.E., et al., Plasma Proteome Profiling to detect and avoid sample-related  
753 biases in biomarker studies. *EMBO Mol Med*, 2019. 11(11): p. e10427.

- 754 12. Brennan, K., et al., A comparison of methods for the isolation and separation of  
755 extracellular vesicles from protein and lipid particles in human serum. *Scientific Reports*,  
756 2020. 10(1): p. 1039.
- 757 13. Van Deun, J., et al., The impact of disparate isolation methods for extracellular  
758 vesicles on downstream RNA profiling. *J Extracell Vesicles*, 2014. 3.
- 759 14. They, C., et al., Minimal information for studies of extracellular vesicles 2018  
760 (MISEV2018): a position statement of the International Society for Extracellular Vesicles and  
761 update of the MISEV2014 guidelines. *J Extracell Vesicles*, 2018. 7(1): p. 1535750.
- 762 15. Tian, Y., et al., Quality and efficiency assessment of six extracellular vesicle isolation  
763 methods by nano-flow cytometry. *J Extracell Vesicles*, 2020. 9(1): p. 1697028.
- 764 16. Veerman, R.E., et al., Molecular evaluation of five different isolation methods for  
765 extracellular vesicles reveals different clinical applicability and subcellular origin. *Journal of*  
766 *Extracellular Vesicles*, 2021. 10(9): p. e12128.
- 767 17. de Menezes-Neto, A., et al., Size-exclusion chromatography as a stand-alone  
768 methodology identifies novel markers in mass spectrometry analyses of plasma-derived  
769 vesicles from healthy individuals. *J Extracell Vesicles*, 2015. 4: p. 27378.
- 770 18. Gidlöf, O., et al., Proteomic profiling of extracellular vesicles reveals additional  
771 diagnostic biomarkers for myocardial infarction compared to plasma alone. *Sci Rep*, 2019.  
772 9(1): p. 8991.
- 773 19. Askeland, A., et al., Mass-Spectrometry Based Proteome Comparison of  
774 Extracellular Vesicle Isolation Methods: Comparison of ME-kit, Size-Exclusion  
775 Chromatography, and High-Speed Centrifugation. *Biomedicines*, 2020. 8(8): p. 246.
- 776 20. Palviainen, M., et al., Extracellular vesicles from human plasma and serum are  
777 carriers of extravesicular cargo-Implications for biomarker discovery. *PLoS One*, 2020.  
778 15(8): p. e0236439.
- 779 21. Cao, F., et al., Proteomics comparison of exosomes from serum and plasma  
780 between ultracentrifugation and polymer-based precipitation kit methods. *Electrophoresis*,  
781 2019. 40(23-24): p. 3092-3098.

- 782 22. Jung, H.H., et al., Cytokine profiling in serum-derived exosomes isolated by different  
783 methods. *Scientific Reports*, 2020. 10(1): p. 14069.
- 784 23. Stranska, R., et al., Comparison of membrane affinity-based method with size-  
785 exclusion chromatography for isolation of exosome-like vesicles from human plasma.  
786 *Journal of Translational Medicine*, 2018. 16(1): p. 1.
- 787 24. Gutiérrez García, G., et al., Analysis of RNA yield in extracellular vesicles isolated by  
788 membrane affinity column and differential ultracentrifugation. *PLoS One*, 2020. 15(11): p.  
789 e0238545.
- 790 25. Peterka, O., et al., Lipidomic characterization of exosomes isolated from human  
791 plasma using various mass spectrometry techniques. *Biochim Biophys Acta Mol Cell Biol*  
792 *Lipids*, 2020. 1865(5): p. 158634.
- 793 26. Shtam, T., et al., Evaluation of immune and chemical precipitation methods for  
794 plasma exosome isolation. *PLoS One*, 2020. 15(11): p. e0242732.
- 795 27. Welton, J.L., et al., Ready-made chromatography columns for extracellular vesicle  
796 isolation from plasma. *J Extracell Vesicles*, 2015. 4: p. 27269.
- 797 28. Thompson, A.G., et al., CSF extracellular vesicle proteomics demonstrates altered  
798 protein homeostasis in amyotrophic lateral sclerosis. *Clin Proteomics*, 2020. 17: p. 31.
- 799 29. Subedi, P., et al., Comparison of methods to isolate proteins from extracellular  
800 vesicles for mass spectrometry-based proteomic analyses. *Anal Biochem*, 2019. 584: p.  
801 113390.
- 802 30. Mi, H., et al., PANTHER version 14: more genomes, a new PANTHER GO-slim and  
803 improvements in enrichment analysis tools. *Nucleic Acids Res*, 2019. 47(D1): p. D419-D426.
- 804 31. Kim, D.K., et al., EVpedia: an integrated database of high-throughput data for  
805 systemic analyses of extracellular vesicles. *J Extracell Vesicles*, 2013. 2.
- 806 32. Kalra, H., et al., Vesiclepedia: a compendium for extracellular vesicles with  
807 continuous community annotation. *PLoS Biol*, 2012. 10(12): p. e1001450.
- 808 33. Simpson, R.J., H. Kalra, and S. Mathivanan, ExoCarta as a resource for exosomal  
809 research. *J Extracell Vesicles*, 2012. 1.

- 810 34. Jorgensen, M., et al., Extracellular Vesicle (EV) Array: microarray capturing of  
811 exosomes and other extracellular vesicles for multiplexed phenotyping. *J Extracell Vesicles*,  
812 2013. 2.
- 813 35. Akawi, N., et al., Fat-Secreted Ceramides Regulate Vascular Redox State and  
814 Influence Outcomes in Patients With Cardiovascular Disease. *Journal of the American*  
815 *College of Cardiology*, 2021. 77(20): p. 2494-2513.
- 816 36. Serrano-Pertierra, E., et al., Characterization of Plasma-Derived Extracellular  
817 Vesicles Isolated by Different Methods: A Comparison Study. *Bioengineering (Basel)*, 2019.  
818 6(1).
- 819 37. Gámez-Valero, A., et al., Size-Exclusion Chromatography-based isolation minimally  
820 alters Extracellular Vesicles' characteristics compared to precipitating agents. *Sci Rep*, 2016.  
821 6: p. 33641.
- 822 38. Webber, J. and A. Clayton, How pure are your vesicles? *J Extracell Vesicles*, 2013.  
823 2.
- 824 39. Théry, C., et al., Minimal information for studies of extracellular vesicles 2018  
825 (MISEV2018): a position statement of the International Society for Extracellular Vesicles and  
826 update of the MISEV2014 guidelines. *J Extracell Vesicles*, 2018. 7(1): p. 1535750.
- 827 40. Skotland, T., et al., An emerging focus on lipids in extracellular vesicles. *Adv Drug*  
828 *Deliv Rev*, 2020. 159: p. 308-321.
- 829 41. Karimi, N., et al., Detailed analysis of the plasma extracellular vesicle proteome after  
830 separation from lipoproteins. *Cell Mol Life Sci*, 2018. 75(15): p. 2873-2886.
- 831 42. Yuana, Y., et al., Co-isolation of extracellular vesicles and high-density lipoproteins  
832 using density gradient ultracentrifugation. *J Extracell Vesicles*, 2014. 3.
- 833 43. Gidlof, O., et al., Proteomic profiling of extracellular vesicles reveals additional  
834 diagnostic biomarkers for myocardial infarction compared to plasma alone. *Sci Rep*, 2019.  
835 9(1): p. 8991.
- 836 44. Bæk, R. and M.M. Jørgensen, Multiplexed Phenotyping of Small Extracellular  
837 Vesicles Using Protein Microarray (EV Array). *Methods Mol Biol*, 2017. 1545: p. 117-127.

- 838 45. Tóth, E., et al., Formation of a protein corona on the surface of extracellular vesicles  
839 in blood plasma. *J Extracell Vesicles*, 2021. 10(11): p. e12140.
- 840 46. Tian, B.M., et al., Human platelet lysate supports the formation of robust human  
841 periodontal ligament cell sheets. *J Tissue Eng Regen Med*, 2018. 12(4): p. 961-972.
- 842 47. Mathieu, M., et al., Specificities of exosome versus small ectosome secretion  
843 revealed by live intracellular tracking of CD63 and CD9. *Nat Commun*, 2021. 12(1): p. 4389.
- 844 48. Martínez-Beamonte, R., et al., Sphingomyelin in high-density lipoproteins: structural  
845 role and biological function. *Int J Mol Sci*, 2013. 14(4): p. 7716-41.
- 846 49. Sódar, B.W., et al., Low-density lipoprotein mimics blood plasma-derived exosomes  
847 and microvesicles during isolation and detection. *Sci Rep*, 2016. 6: p. 24316.
- 848 50. Izzo, C., F. Grillo, and E. Murador, Improved method for determination of high-  
849 density-lipoprotein cholesterol I. Isolation of high-density lipoproteins by use of polyethylene  
850 glycol 6000. *Clin Chem*, 1981. 27(3): p. 371-4.
- 851 51. Simonsen, J.B., What Are We Looking At? Extracellular Vesicles, Lipoproteins, or  
852 Both? *Circ Res*, 2017. 121(8): p. 920-922.
- 853



854 **Figures**

855 **Figure 1: A methodological overview.** Platelet poor plasma was obtained from healthy  
856 volunteers (n=4) and patients presenting with myocardial infarction (MI) (n=6) (and from the  
857 same patients 1-month post-MI) and plasma extracellular vesicles (EV) isolated using five  
858 different methods: ultracentrifugation (UC), precipitation, acoustic trapping, size exclusion  
859 chromatography (SEC) and immunoaffinity capture with a matched vehicle phosphate  
860 buffered saline (PBS) or IgG control. The plasma EV were analyzed using Nanoparticle  
861 Tracking Analysis, protein concentration, Western blot, transmission electron microscopy, a  
862 targeted EV-protein array for EV-markers CD9, CD63, CD81, ALIX, TSG101, flotillin,  
863 Annexin V and 18 other cell associated markers, untargeted proteomics (LC-MS/MS) and  
864 targeted sphingolipidomics (LC-MS/MS). The data were analyzed in insolation and following  
865 integrated hierarchical clustering and principal component analysis.

866

867 **Figure 2: Plasma EV characterization using different isolation methods. (A)** Total  
868 plasma extracellular vesicles (EV) / mL concentrations and **(B)** size and concentration  
869 distribution profiles were obtained by Nanoparticle Tracking Analysis (NTA) using  
870 ultracentrifugation (UC), precipitation, acoustic trapping, size exclusion chromatography  
871 (SEC) and immunoaffinity capture (n=4). Values are presented as a delta compared to a  
872 vehicle control or IgG control. Scale is logarithmic. **(C)** Protein concentration of plasma EV  
873 using UC, precipitation, acoustic trapping, SEC and immunoaffinity capture (n=4). Values  
874 are presented as a delta compared to a vehicle control or IgG control. **(D)** Western blot of  
875 plasma EV derived from UC, precipitation, acoustic trapping, SEC and immunoaffinity  
876 capture versus controls using EV markers ALIX and CD63, lipoprotein contaminants  
877 apolipoprotein B (ApoB), and apolipoprotein A-I (ApoA-I), plasma contaminant albumin and  
878 cellular contaminant histone H3. Endothelial cell EV and Peripheral blood mononuclear cells  
879 (PBMCs) were used for H3 positive controls. **(E-J).** Transmission electron microscopy (TEM)  
880 images of isolated plasma EV from UC, precipitation, acoustic trapping, SEC and  
881 immunoaffinity capture versus controls. Each sub panel contains a zoomed-in image (left

882 image), an overview image (top right) and a control vehicle image (bottom right). For the  
883 immunoaffinity bead capture images, the red arrows indicate EV particles. The scale bar is  
884 200 nm for the zoomed images surrounded by a dashed line and 1000 nm for the overview  
885 images and **J**. Values in **A** and **C** are group average  $\pm$  standard deviation (SD). Data are  
886 group average  $\pm$  standard deviation (SD) (n=6).

887 Data was analyzed by one-way ANOVA with post-hoc Bonferroni correction. \*\*\*p<0.001.

888

889 **Figure 3: Heatmap of plasma EV derived from different isolation methods using the**  
890 **EV- protein-Array.** The heatmap contains extracellular vesicles (EV) markers CD9, CD81,  
891 CD63, ALIX, TSG101, Flotillin 1 and Annexin V for ultracentrifugation (UC), precipitation,  
892 acoustic trapping, size exclusion chromatography (SEC) and immunoaffinity capture, lipid  
893 contaminants apolipoprotein H (ApoH) and apolipoprotein E (ApoE) and cell associated  
894 markers. Values are presented as a delta compared to a vehicle control or IgG control and  
895 are log normalized (n=4 per isolation method). Data was analyzed by Kruskal-Wallis test  
896 with post-hoc Bonferroni correction. \*p<0.05, \*\*\*p<0.001.

897

898 **Figure 4: Proteomic comparison of plasma EV isolation methods. (A)** The number of  
899 protein groups quantified by unbiased proteomics for plasma extracellular vesicles (EV)  
900 derived by: ultracentrifugation (UC), precipitation, acoustic trapping, size exclusion  
901 chromatography (SEC) and immunoaffinity capture, versus control vehicle (PBS) or an IgG  
902 control. Protein groups were only included as quantified if they had  $\geq 2$  unique peptides.  
903 (n=3-4). One-way ANOVA with post-hoc Bonferroni correction. Data are group averages  $\pm$   
904 standard deviation (SD). \*p<0.05, \*\*\*p<0.001. **(B)** A heatmap of the top 30 quantified protein  
905 groups across all isolation methods. Values from control samples were subtracted to  
906 account for background and the values were log normalised. Hierarchical clustering of the  
907 isolation methods was conducted using a complete clustering method. (n=3-4).

908

909 **Figure 5: Sphingolipidomic analysis of plasma EV from different isolation methods.**

910 **(A)** Number of sphingolipids quantified in plasma extracellular vesicles (EV) isolated by  
911 ultracentrifugation (UC), precipitation, acoustic trapping, size-exclusion chromatography  
912 (SEC) and immunoaffinity capture and subjected to targeted sphingolipid analysis versus  
913 control vehicle (PBS) or an IgG control. Data are group averages  $\pm$  standard deviation (SD)  
914 and were analysed by One-way ANOVA with post-hoc Bonferroni correction. \*\*\* $p < 0.001$ .  
915 (n=4) **(B)** Heat map of plasma EV sphingolipids. Values from control samples were  
916 subtracted to account for background and the values were log normalised. Hierarchical  
917 clustering of the isolation methods was conducted using a complete clustering method. (n=3-  
918 4). Data were analysed by Kruskal-Wallis test with post-hoc Bonferroni correction.

919

920 **Figure 6: Principal component analysis of plasma EV characteristics following data**

921 **integration. (A)** A principal component (PC) analysis of plasma extracellular vesicles (EV)  
922 isolated by ultracentrifugation (UC), precipitation, acoustic trapping, size-exclusion  
923 chromatography (SEC) and immunoaffinity capture: including plasma EV concentration,  
924 protein concentration, EV-protein-Array, proteomics and sphingolipidomics. The integrated  
925 data was condensed to PC1 and PC2. **(B)** A heatmap with the various principal components  
926 to compare the different isolation plasma EV isolation methods. Hierarchical clustering of the  
927 isolation methods was conducted using a complete clustering method. (n=3-4).

928

929 **Figure 7: Plasma EV analysis using different isolation methods in patients following**

930 **presentation with myocardial (MI) infarction compared to samples from the same**

931 **patients after a 1-month follow up. (A)** Comparison of concentration and size-distribution

932 profile by Nanoparticle Tracking Analysis of plasma extracellular vesicles (EV) from patients

933 following presentation with MI and after a 1-month follow up using: ultracentrifugation (UC),

934 precipitation, acoustic trapping, size exclusion chromatography (SEC) and immunoaffinity

935 capture (n=6 per timepoint). Data are group average  $\pm$  standard deviation (SD). Paired T-

936 test analysis \* $p < 0.05$ . **(B)** A Pearson correlation analysis of plasma EV / mL derived from

937 each isolation method at time of presentation vs. the infarct size determined by cardiac MRI  
938 using late gadolinium enhancement 6-months post-infarct (n=5). **(C)** Heatmap of plasma EV-  
939 Array analysis. The top section of the heatmap contains the different EV markers CD9,  
940 CD81, CD63, ALIX, TSG101, Flotillin 1 and Annexin V. Values are presented as fold over  
941 the respective matched follow up control sample. **(D)** Heatmap showing the plasma EV  
942 sphingolipidomic profiles in MI patients at presentation versus a 1-month follow up for UC,  
943 precipitation, acoustic trapping, SEC and immunoaffinity capture. Values are presented as  
944 fold over the respective matched follow up.

945

946 **Figure 8: Principal component analysis of integrated plasma EV characterisation at**  
947 **time of presentation with myocardial infarction (MI) vs. 1-month follow-up in the same**  
948 **patients using different plasma EV isolation methods.** A principal component (PC)  
949 analysis of plasma EV isolated by ultracentrifugation (UC), precipitation, acoustic trapping,  
950 size-exclusion chromatography (SEC) and immunoaffinity capture from patients presenting  
951 with MI versus a 1-month follow up control. Plasma EV characteristics include including  
952 plasma EV concentration, protein concentration, EV-protein-Array and sphingolipidomics.  
953 The integrated data was condensed to PC1 and PC2. (n=5-6). The eclipses indicate the  
954 95% confidence interval.

955

956 **Tables**

957 **Table 1: Nanoparticle Tracking Analysis showing the mean and median size of**  
958 **plasma- EV** isolated by ultracentrifugation (UC), precipitation, acoustic trapping, size-  
959 exclusion chromatography (SEC). Immunoaffinity capture can not be acquired. Data are  
960 group averages  $\pm$  standard deviation (SD) and were analyzed by One-way ANOVA with  
961 post-hoc Bonferroni correction. \*\*\* $p < 0.001$ . (n=4).

962

963 **Table 2: Clinical characteristics of the MI patients.** Age, sex (M/F), glucose, white blood  
964 cells counts, troponin peak, cholesterol, diabetes status, smoker status, infarct size  
965 determined by late gadolinium enhancement MRI 6 months post-AMI and left ventricle  
966 ejection fraction (LVEF %) 6 months post-MI. Data are group averages  $\pm$  standard deviation  
967 (SD) (n=6).

968 **Supplemental Figures**

969 **Supplemental Figure 1: The ratio of plasma extracellular vesicles (EV) to protein**  
970 **concentration per isolation method:** ultracentrifugation (UC), precipitation, acoustic  
971 trapping, size-exclusion chromatography (SEC) and immunoaffinity capture. EV are  
972 expressed as per mL and protein concentration is expressed  $\mu\text{g}$ . Values are expressed as  
973 delta over phosphate buffer solution (PBS) control or IgG control. Data are group averages  $\pm$   
974 standard deviation (SD) (n=4). One-way ANOVA with post-hoc Bonferroni correction.  
975 \*\*p<0.01, \*\*\*p<0.001.

976

977 **Supplemental Figure 2: Venn diagram of quantified protein groups in different plasma**  
978 **extracellular vesicle (EV) isolation methods:** ultracentrifugation (UC), precipitation,  
979 acoustic trapping, size-exclusion chromatography (SEC) and immunoaffinity capture.  
980 Quantified protein groups within a method were pooled after subtraction of phosphate buffer  
981 solution (PBS) control or IgG control. Protein groups that had more than 1 repeat within a  
982 method were included in the Venn diagram.

983

984 **Supplemental Figure 3: Gene Ontology analysis of plasma extracellular vesicle (EV)**  
985 **isolation method proteomics:** ultracentrifugation (UC), precipitation, acoustic trapping,  
986 size-exclusion chromatography (SEC) and immunoaffinity capture. **(A)** Quantified protein  
987 groups were expressed as delta over phosphate buffer solution (PBS) control or IgG control.  
988 Quantified protein groups that appeared more than once per method were included in the  
989 Gene Ontology (GO) analysis. The GO cellular components associated with each method  
990 were ranked based on the false discovery rate (FDR) and the top five were included in the  
991 tables. In addition, the GO enrichment scores were plotted against the false discovery rate p-  
992 values in the scatterplot. **(B)** The overlap between quantified protein groups per plasma EV  
993 isolation method and published EV proteomics databases EVpedia, Exocarta and  
994 Vesiclepedia. The table contains the percentage of overlapping protein groups vs. total  
995 protein groups per isolation method, with a p-value calculated by fisher-exact test.

996

997 **Supplemental Figure 4: The overlap between the number of quantified protein groups**  
998 **per plasma extracellular vesicle (EV) isolation method and published plasma EV**  
999 **proteomic datasets.** Quantified protein groups within a method were pooled after  
1000 subtraction of phosphate buffer solution (PBS) control or IgG control. Protein groups that had  
1001 more than 1 repeat within a method were included. Plasma EV-proteomes determined by  
1002 ultracentrifugation (UC), precipitation, acoustic trapping, size-exclusion chromatography  
1003 (SEC) and immunoaffinity capture were compared with published EV proteomic datasets.  
1004 The overlap of protein groups between each method were compared and listed out of the  
1005 total protein groups quantified.

1006

1007 **Supplemental Figure 5: Venn diagram showing the overlap between quantified**  
1008 **sphingolipids in different plasma extracellular vesicles (EV) isolation methods:**  
1009 ultracentrifugation (UC), precipitation, acoustic trapping, size-exclusion chromatography  
1010 (SEC) and immunoaffinity capture. Sphingolipids within a method were pooled after  
1011 subtraction of phosphate buffer solution (PBS) control or IgG control. Sphingolipids that had  
1012 more than 1 repeat within a method were included in the Venn diagram.

1013

1014 **Supplemental Figure 6: Scree plots of each principal component following the**  
1015 **integrated data analysis of plasma extracellular vesicle (EV) isolated with the different**  
1016 **methods:** ultracentrifugation (UC), precipitation, acoustic trapping, size-exclusion  
1017 chromatography (SEC) and immunoaffinity capture. Data from the acquired unbiased  
1018 proteomics, targeted sphingolipidomics, EV-Array analysis and concentration/size analysis  
1019 was pooled for each isolation method. Principal components were generated with the R-  
1020 package *Factoextra* and *FactoMineR*. Each scree plot indicates the percentage of variance  
1021 explained for the principal component and the top 30 drivers for the principal component.  
1022 Data was labelled based on the origin; Lipid indicates data from the targeted sphingolipid

1023 data, EV indicates data from the EV-protein-array and unlabeled was selected for data from  
1024 the proteomics.

1025

1026 **Supplemental Figure 7: Plasma extracellular vesicle (EV) concentration and size**  
1027 **characteristics after isolation from myocardial infarction (MI) patients at time of**  
1028 **presentation and one month follow up. (A)** The variance of plasma EV concentration  
1029 isolated by each method measured by Nanoparticle Tracking Analysis (NTA). The variance  
1030 was calculated by relative standard deviation over three different measurements. Values are  
1031 expressed as delta over phosphate buffer solution (PBS) control or IgG control. **(B)** The  
1032 average size of the isolated plasma EV for each method at time of presentation vs. follow up  
1033 measured by NTA. Immunoaffinity capture can not be acquired. **(C)** Size distribution profiles  
1034 of the plasma EV from MI patients at time of presentation and one month follow up.  
1035 Immunoaffinity capture can not be acquired. Data are group averages  $\pm$  standard deviation  
1036 (SD) (n=12 for **A**, n=6 for **B**, n=6 per time point for **C**). One-way ANOVA with post-hoc  
1037 Bonferroni correction. \*p<0.05 for **A** and **B**.

1038

1039 **Supplemental Figure 8: Sphingolipid concentrations of plasma extracellular vesicles**  
1040 **(EV) isolated by different methods:** ultracentrifugation (UC), precipitation, acoustic  
1041 trapping, size-exclusion chromatography (SEC) and immunoaffinity capture. The fold change  
1042 in sphingolipid concentration in plasma EV isolated at time of presentation with myocardial  
1043 infarction (MI) versus the concentration in plasma EV isolated 1-month post-MI per isolation  
1044 method. Data are group averages  $\pm$  standard deviation (SD) and were analysed by one-way  
1045 ANOVA with post-hoc Bonferroni correction. \*p<0.05 and \*\*p<0.01. (n=5-6)

1046

1047 **Supplemental Figure 9: Plasma extracellular vesicle (EV) sphingolipid concentration**  
1048 **correlation with infarct size.** A Pearson correlation analysis was conducted with the the  
1049 fold change in sphingolipid (**A**: Cer(d18:0/22:0) ; **B**: sphinganine (d18:0) ; **C**: SM(d18:1/18:1)  
1050 concentration in plasma EV isolated at time of presentation with myocardial infarction (MI)



1051 versus the concentration in plasma EV isolated 1-month post-MI by the precipitation method  
1052 versus the infarct size determined by cardiac MRI using late gadolinium enhancement 6-  
1053 months post-infarct (n=5).

# Figure 1

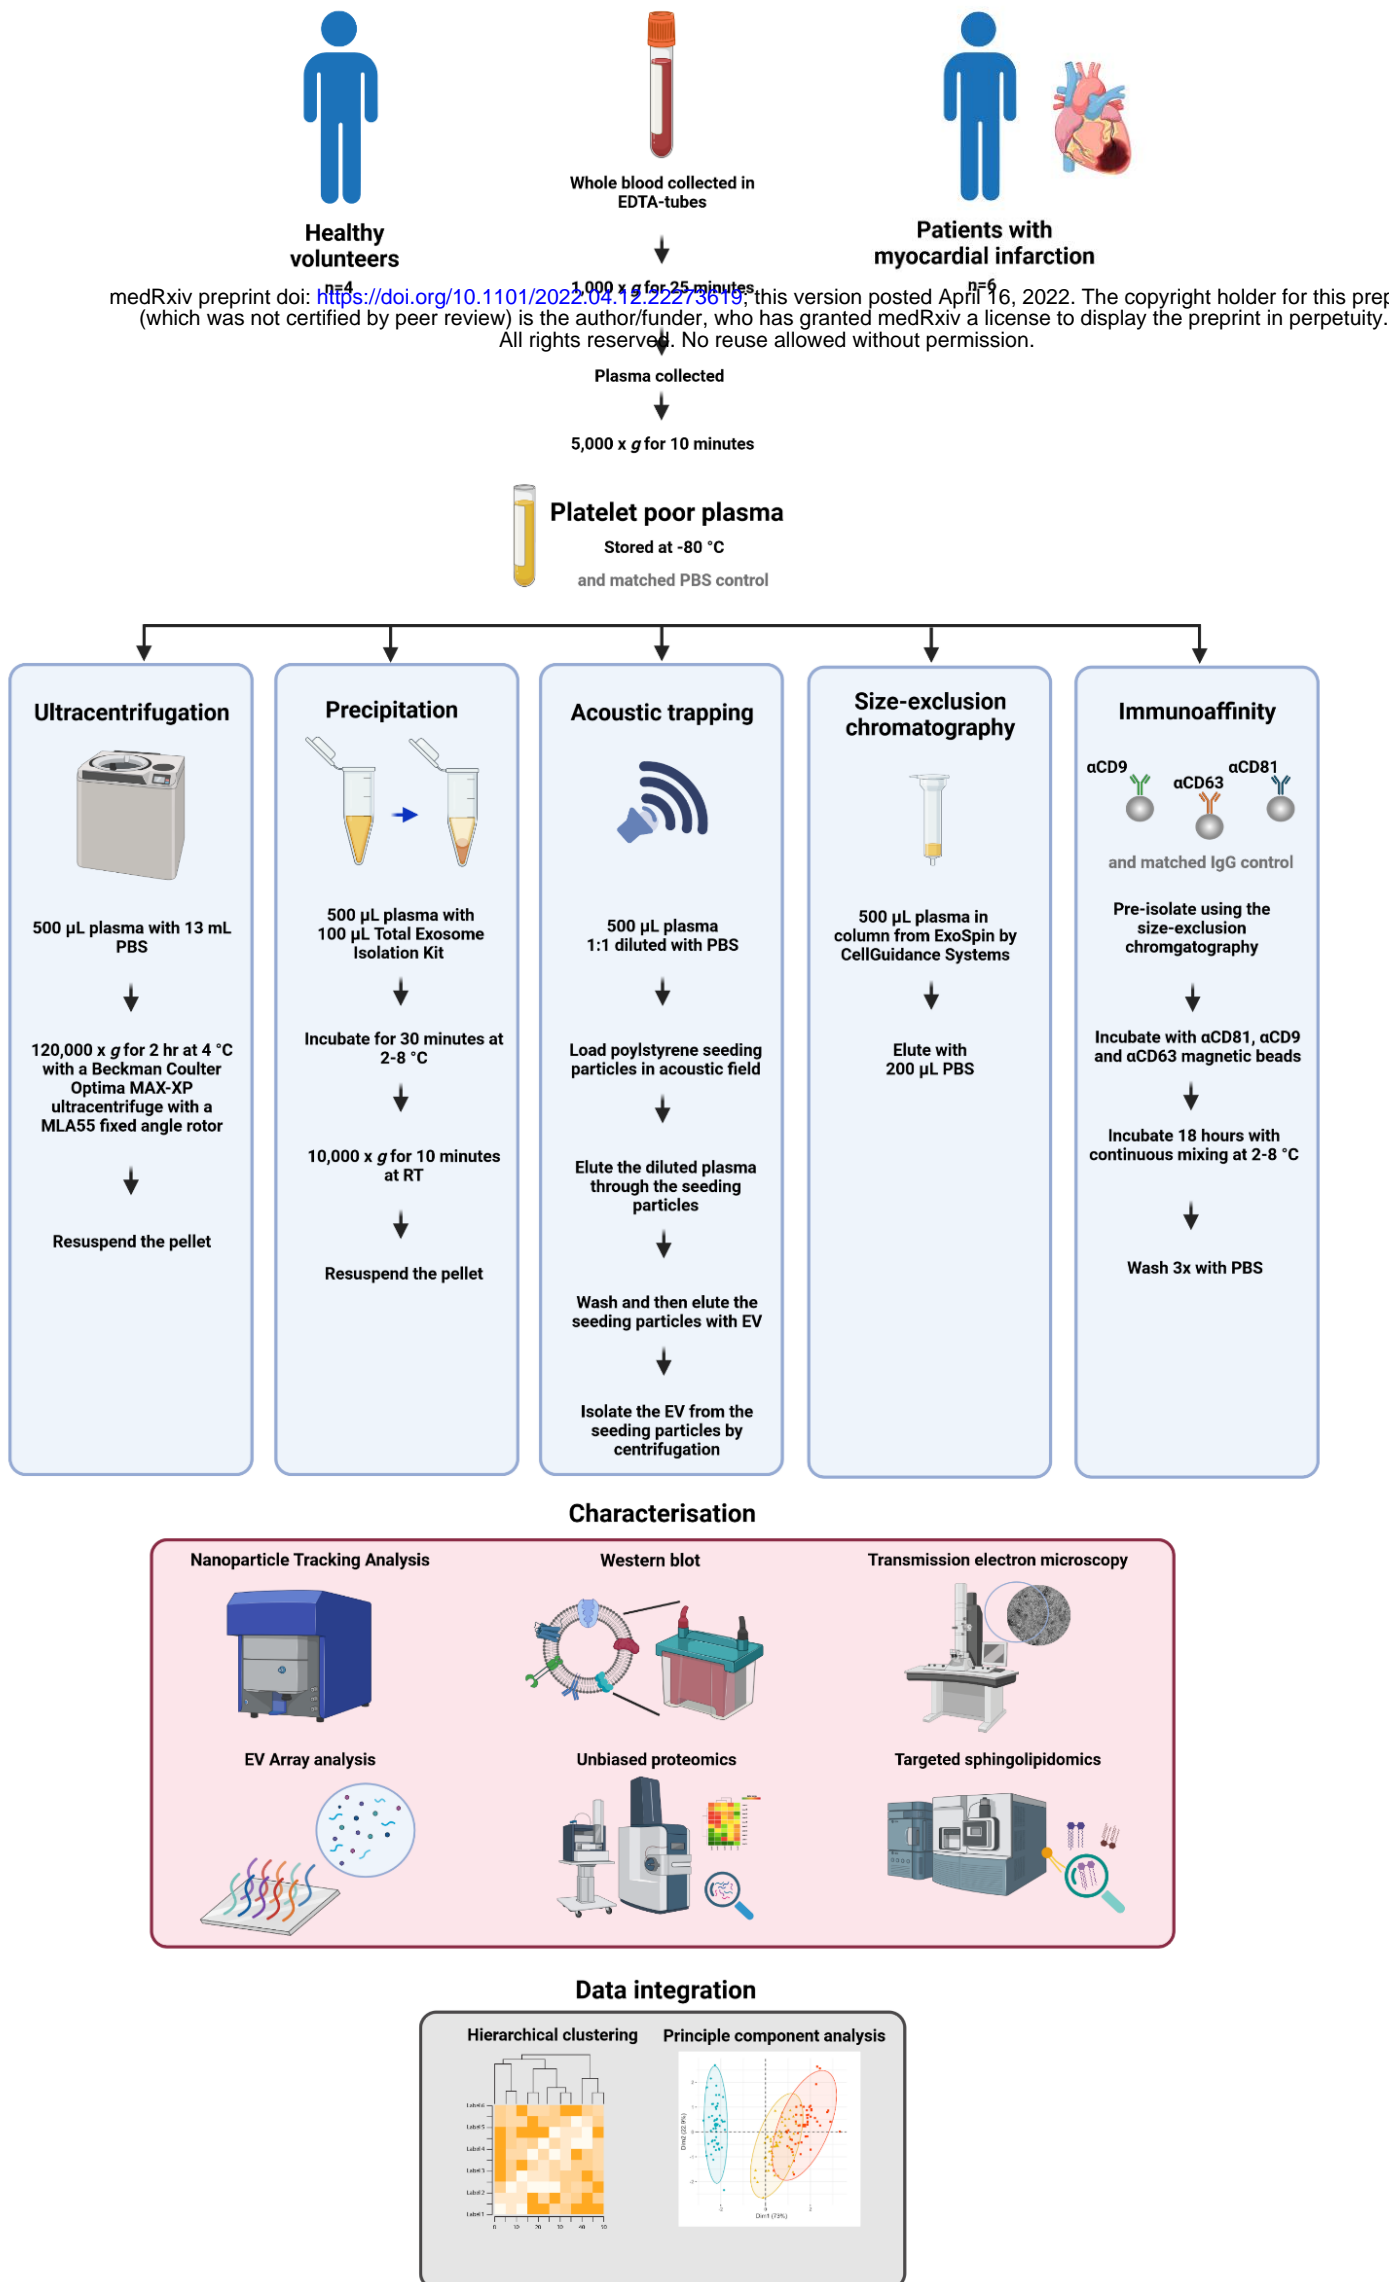

**Figure 2**

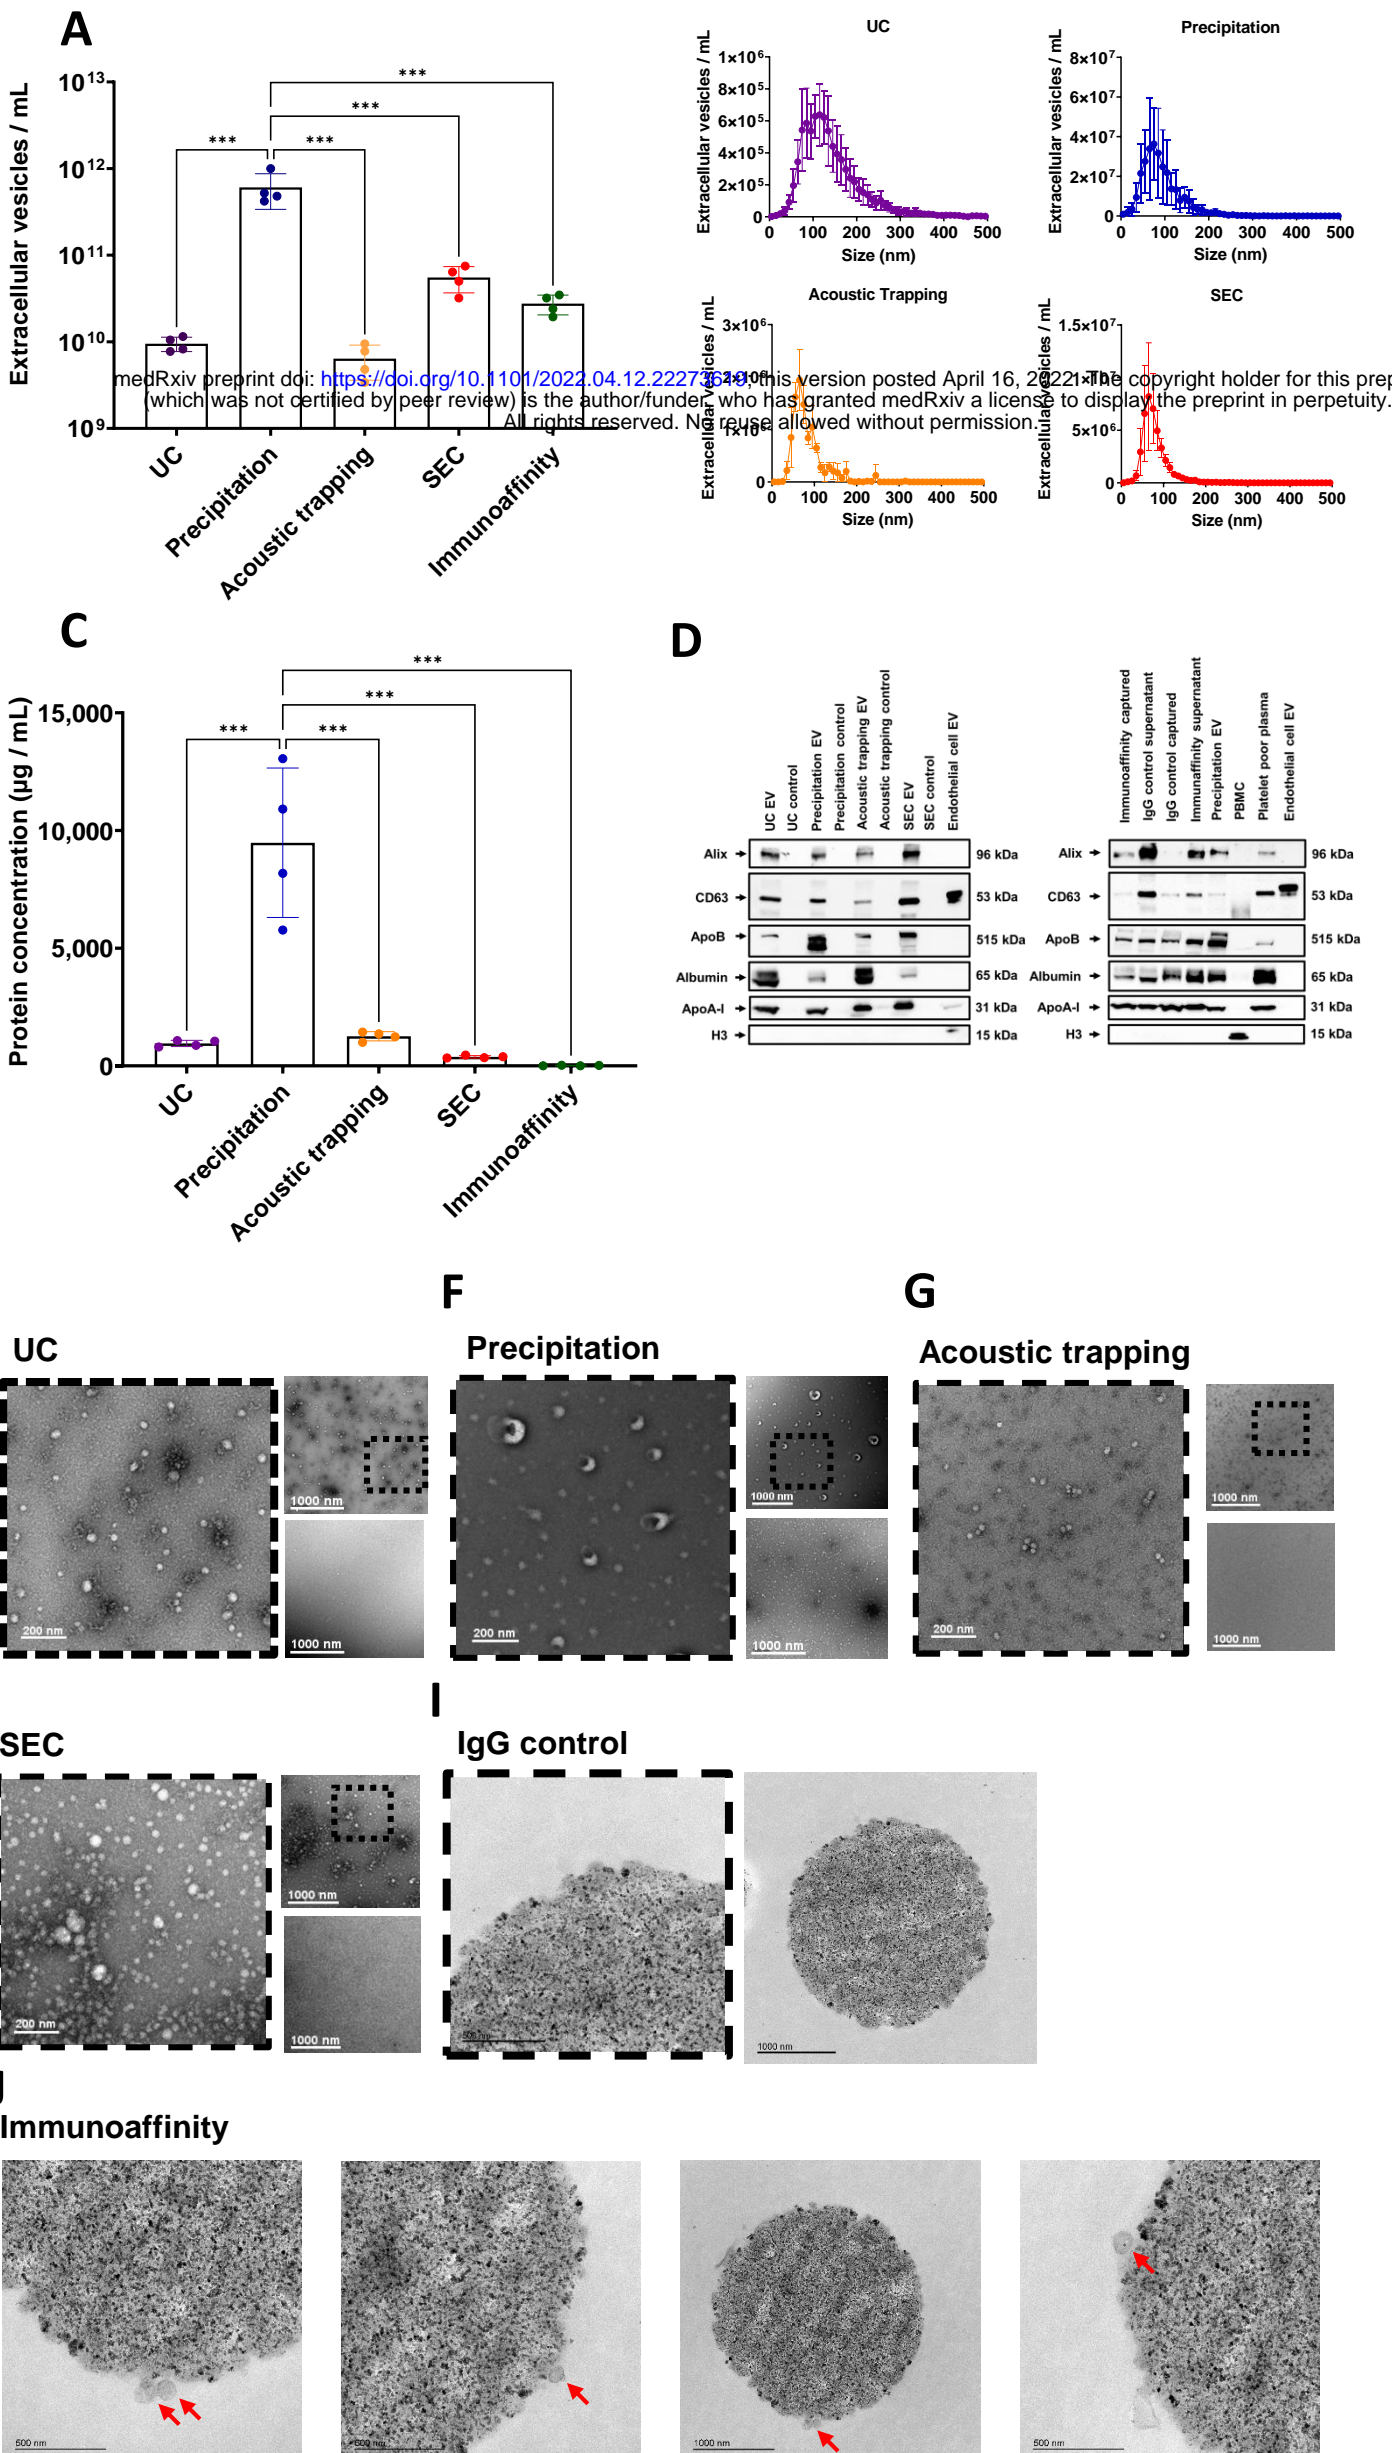

# Figure 3

medRxiv preprint doi: <https://doi.org/10.1101/2022.04.12.22273619>; this version posted April 16, 2022. The copyright holder for this preprint (which was not certified by peer review) is the author/funder, who has granted medRxiv a license to display the preprint in perpetuity. All rights reserved. No reuse allowed without permission.

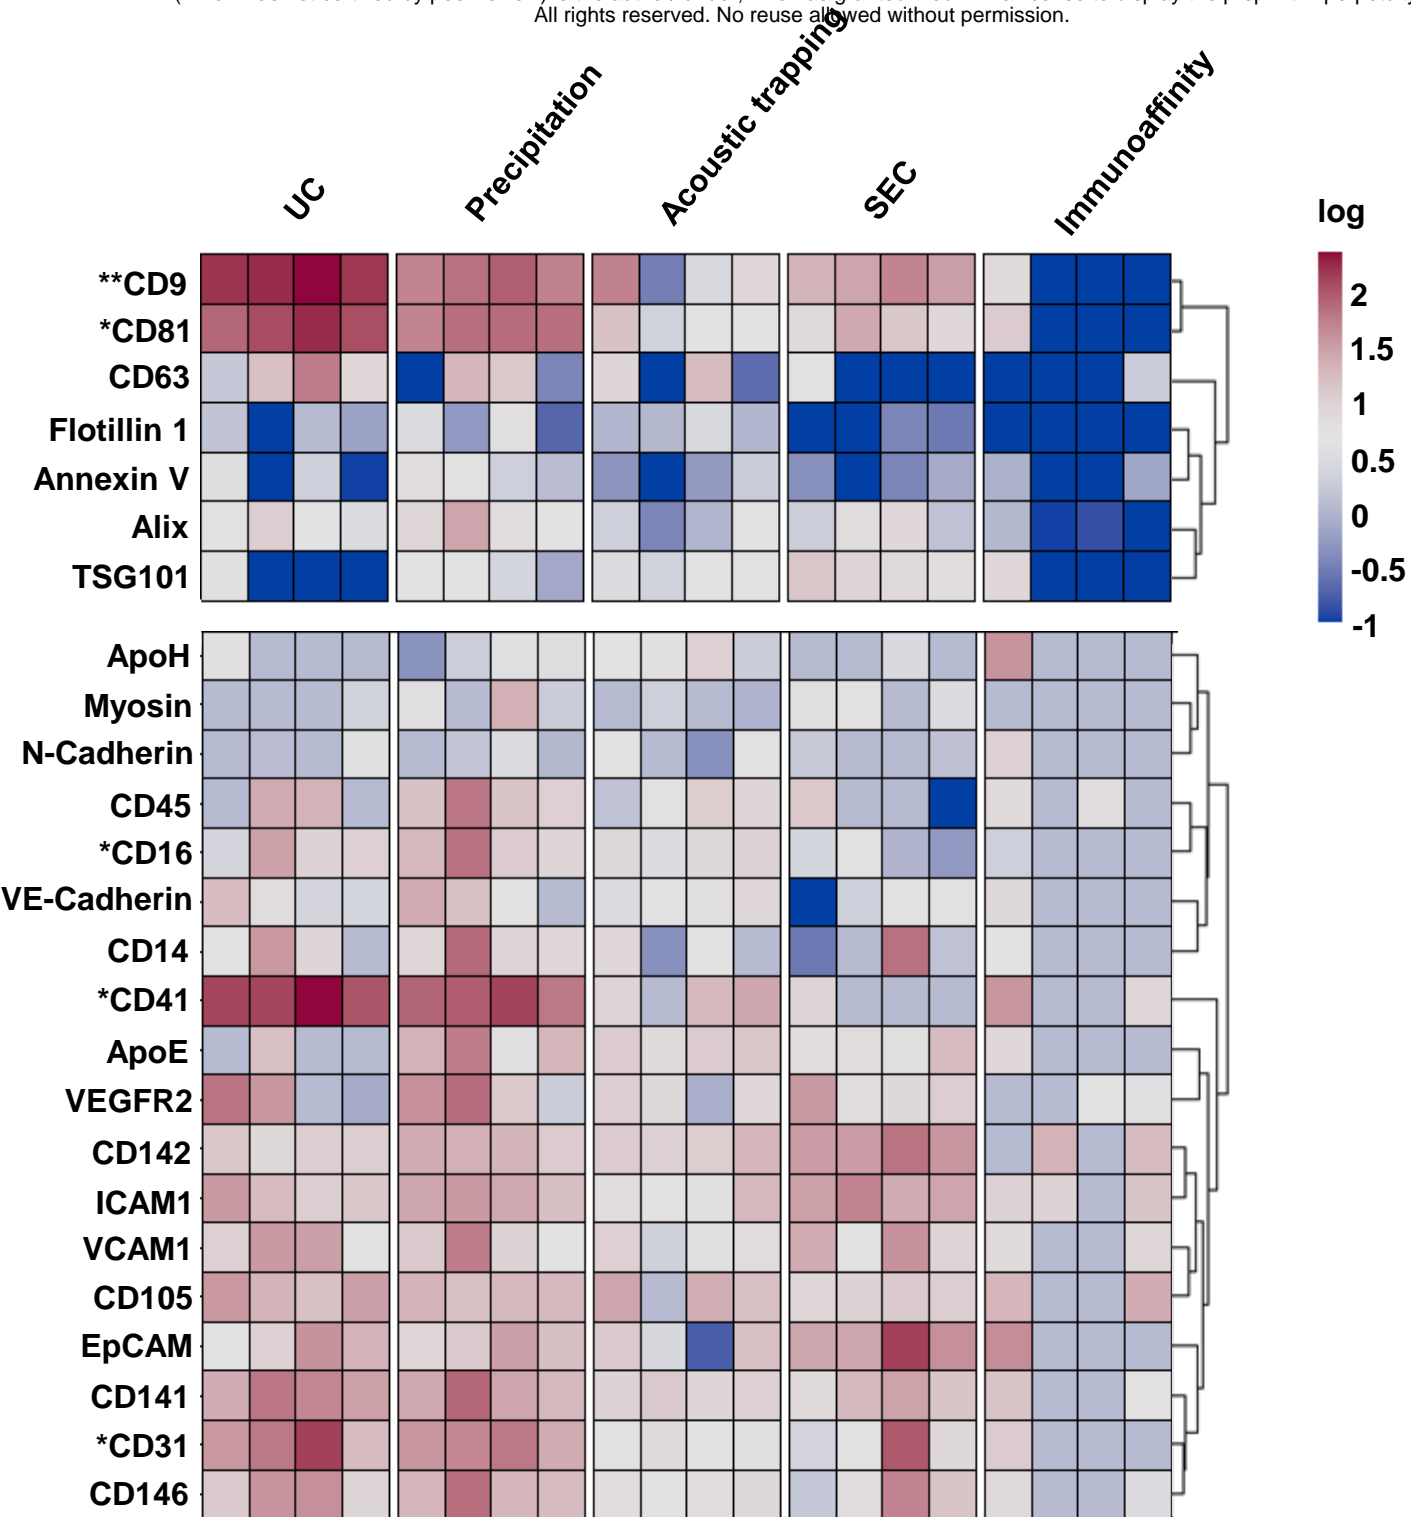

Figure 4

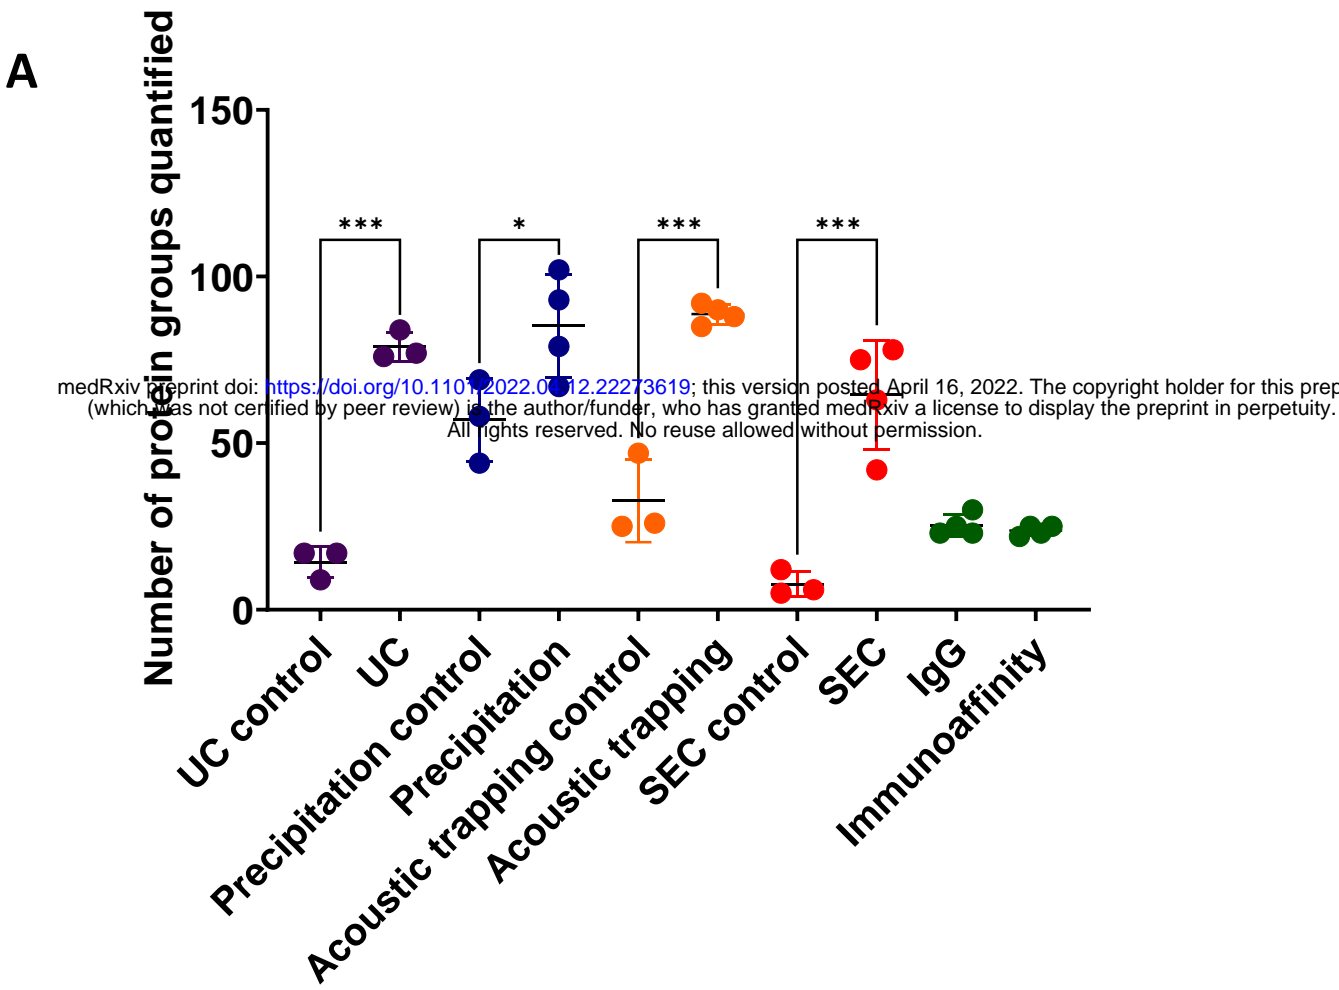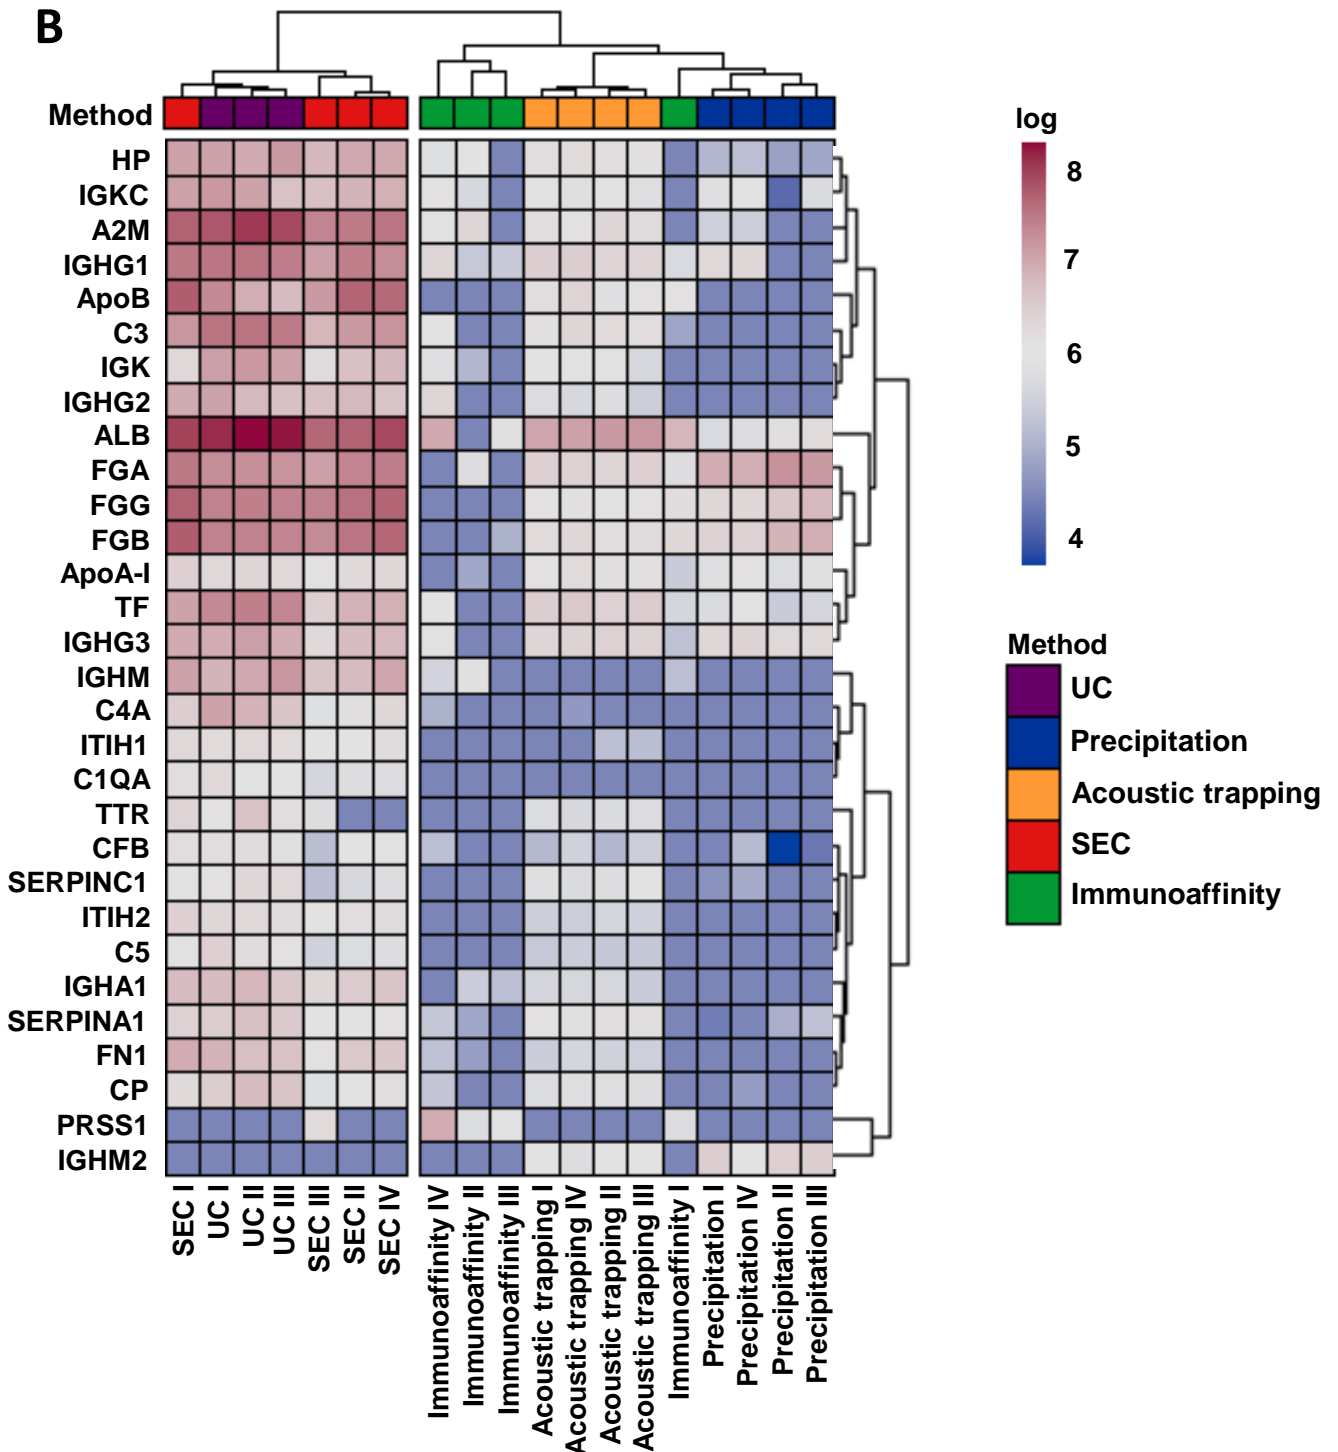



# Figure 6

## A

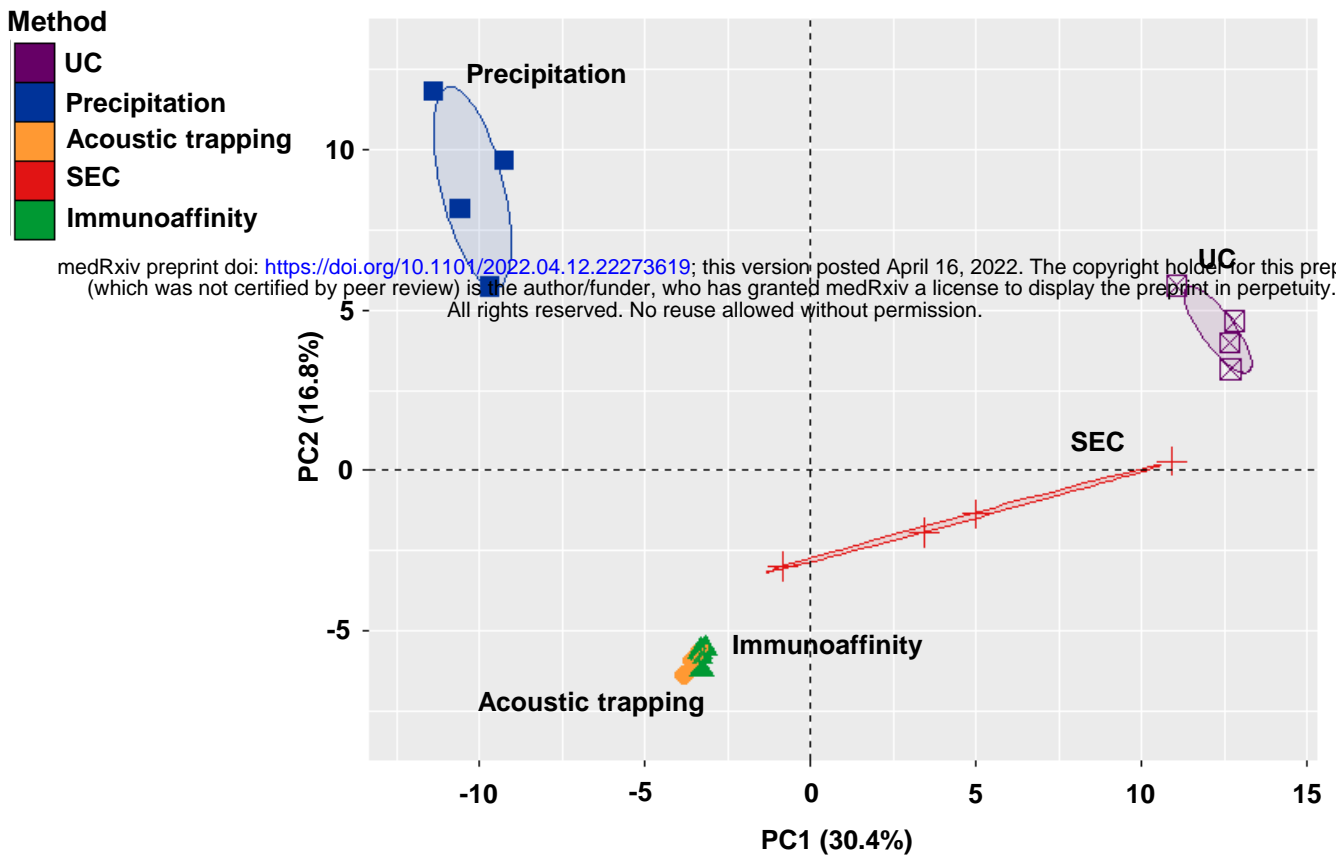

## B

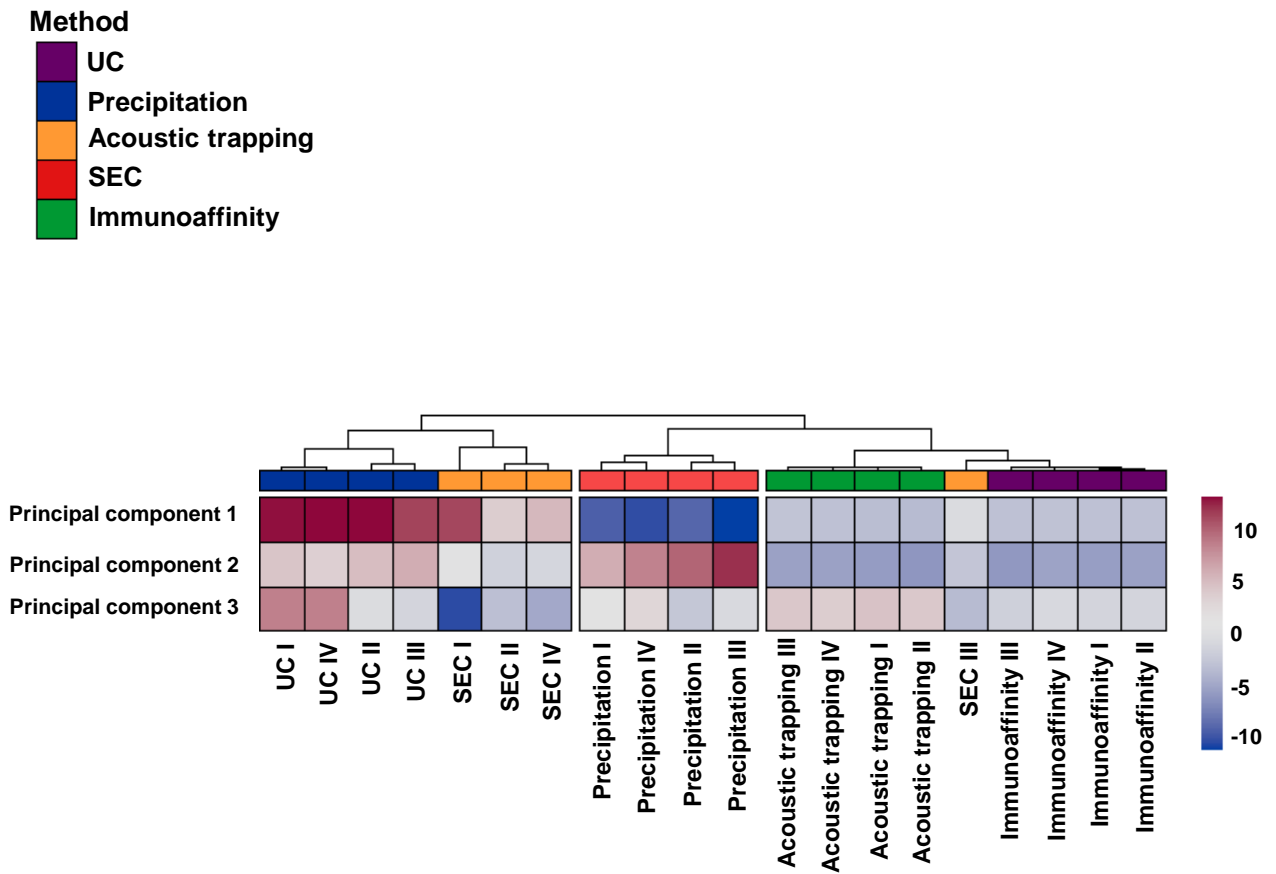



# Figure 7

**A**

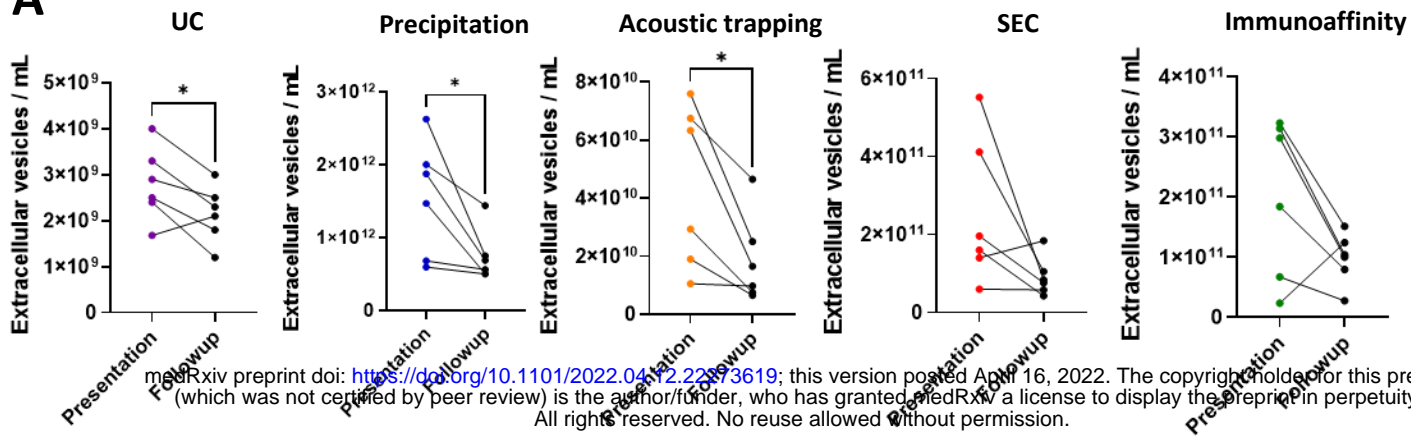

**B**

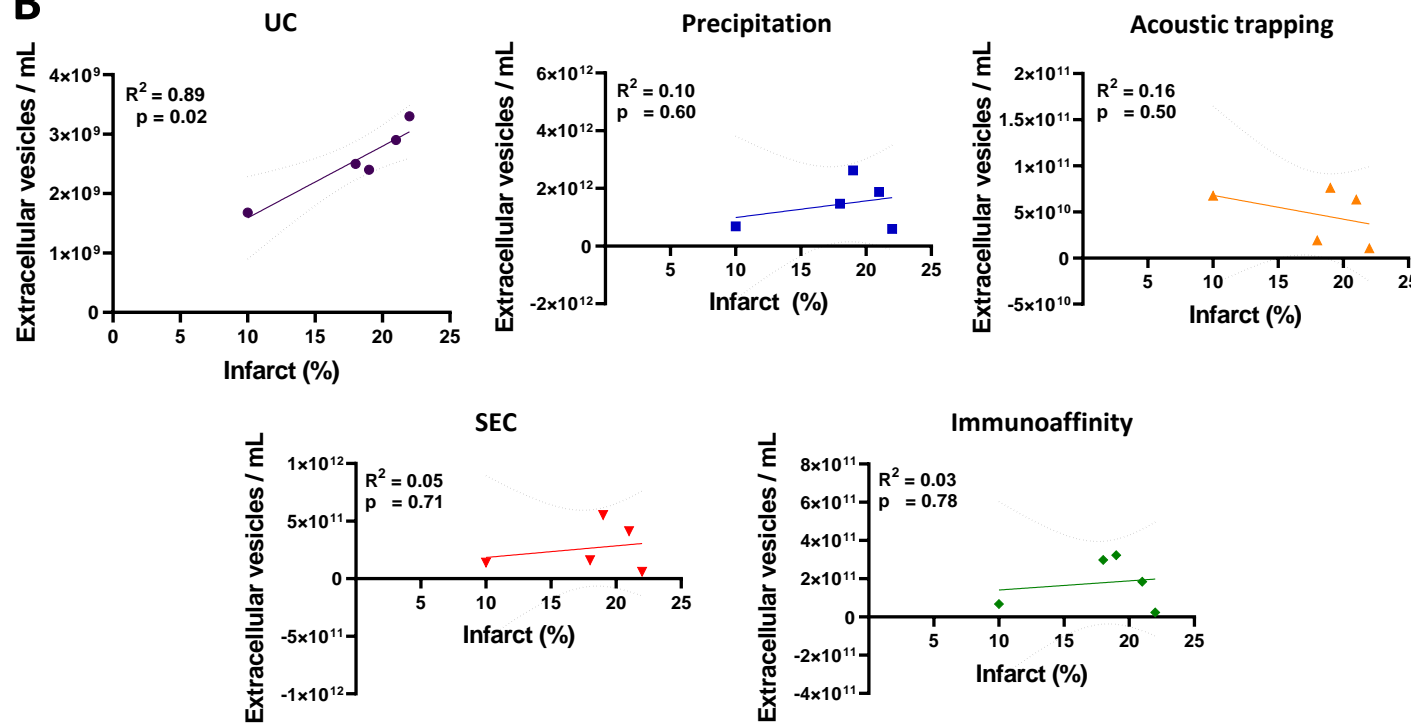

**C**

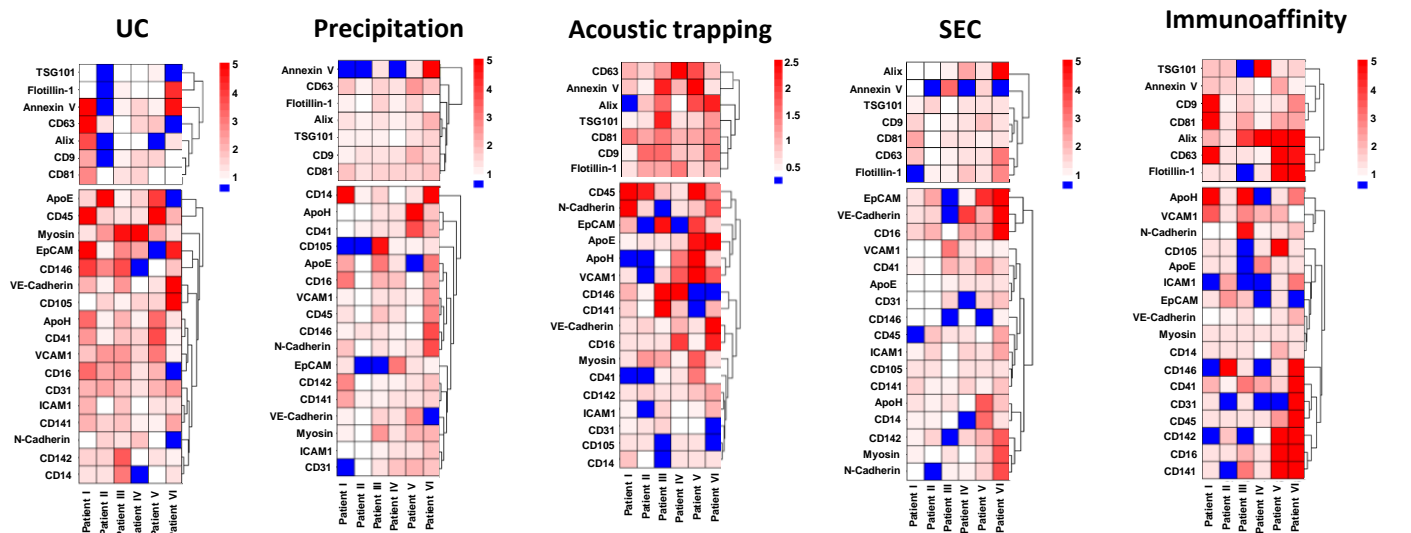

**D**

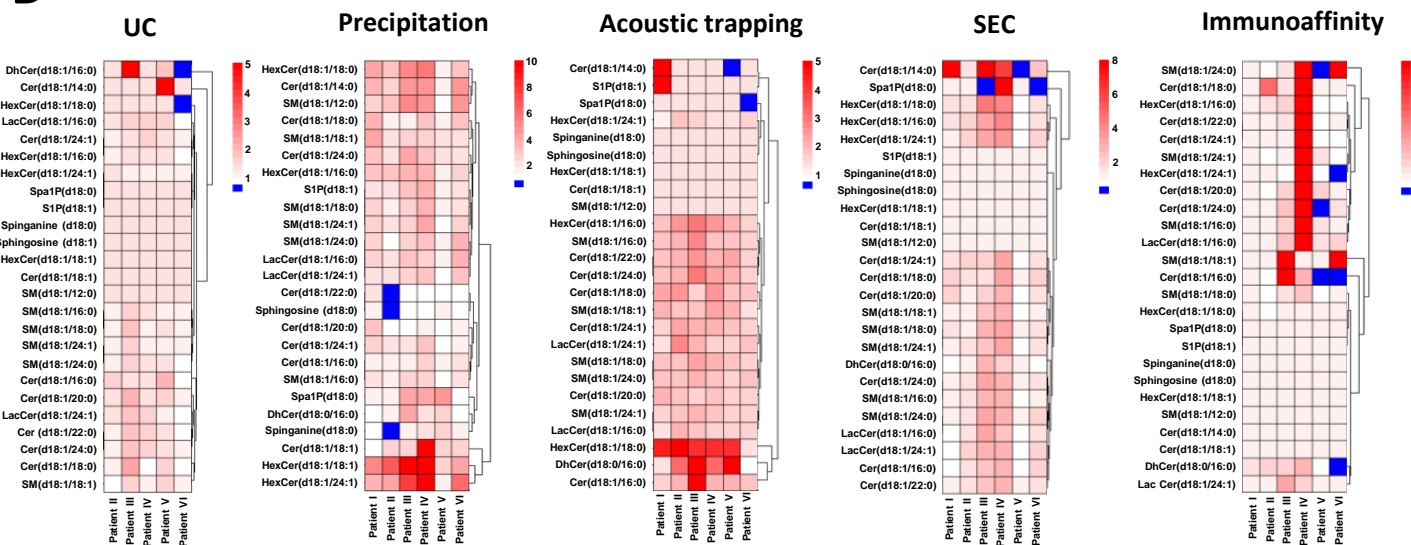



# Figure 8

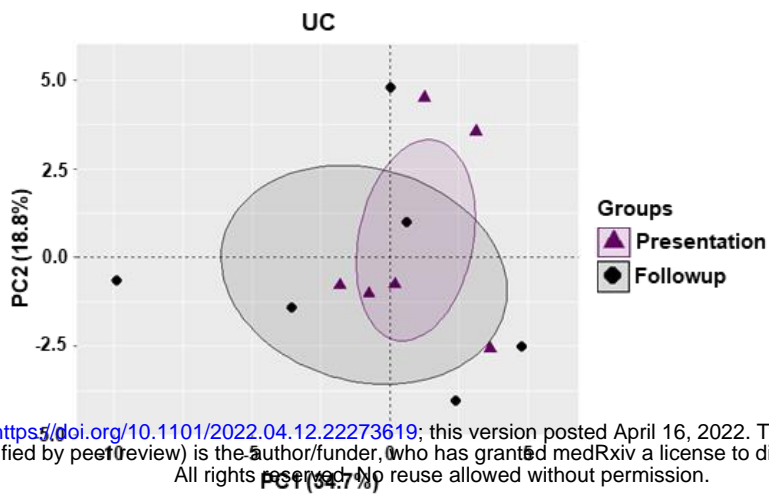

medRxiv preprint doi: <https://doi.org/10.1101/2022.04.12.22273619>; this version posted April 16, 2022. The copyright holder for this preprint (which was not certified by peer review) is the author/funder, who has granted medRxiv a license to display the preprint in perpetuity. All rights reserved. No reuse allowed without permission.

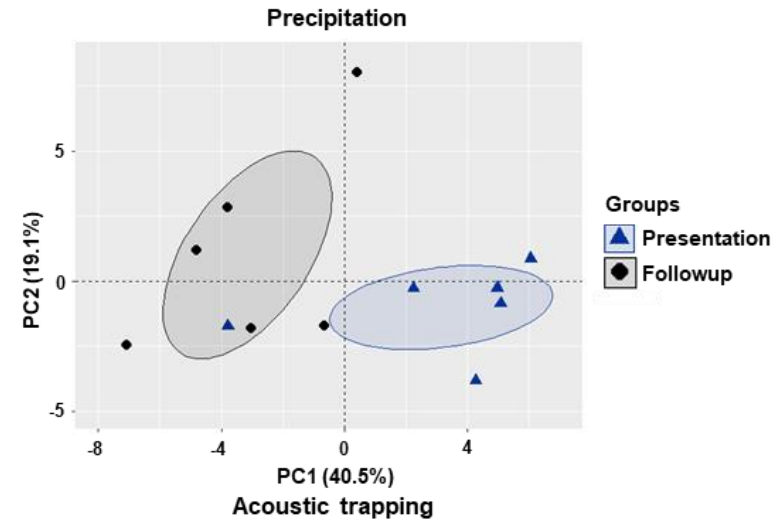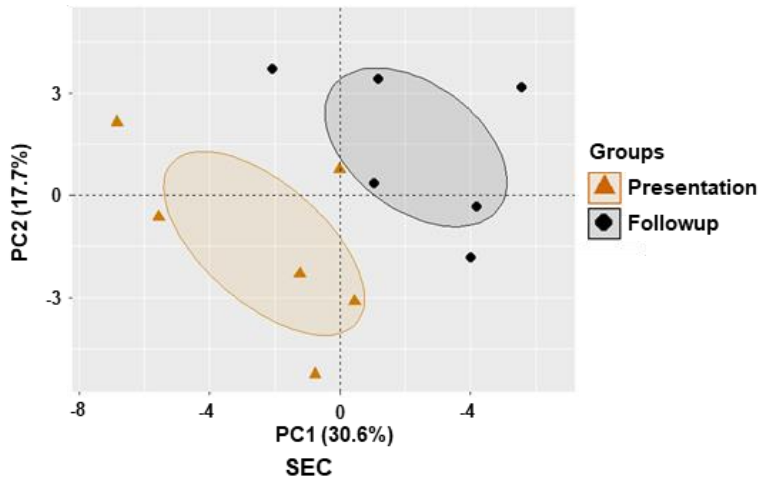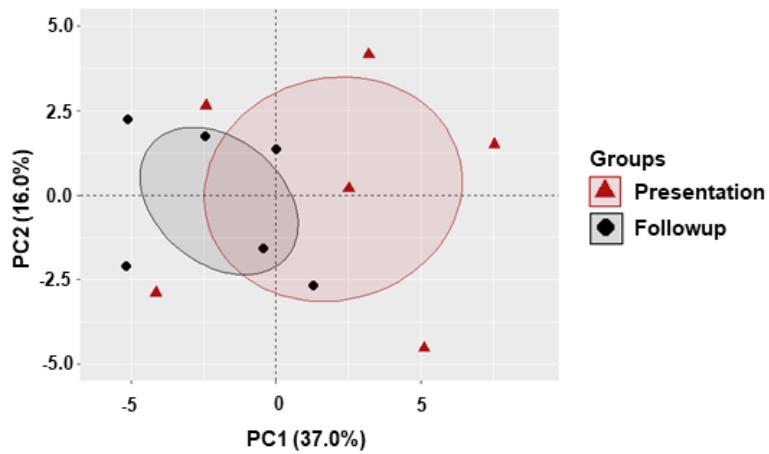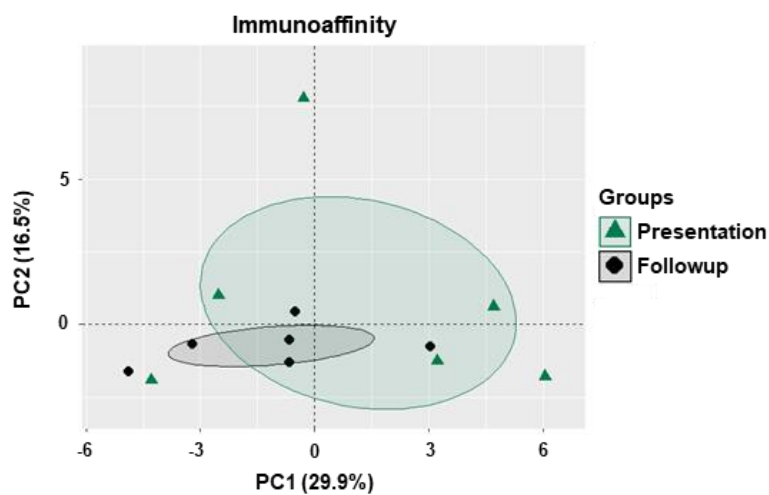

**Table 1**

|                               | <b>Mean size (nm)</b> | <b>Median size (nm)</b> |
|-------------------------------|-----------------------|-------------------------|
| <b>***Ultracentrifugation</b> | <b>143.7 ± 3.4</b>    | <b>125.0 ± 2.9</b>      |
| <b>Precipitation</b>          | <b>94.2 ± 3.9</b>     | <b>84.0 ± 3.7</b>       |
| <b>Acoustic trapping</b>      | <b>81.2 ± 3.9</b>     | <b>70.7 ± 4.6</b>       |
| <b>SEC</b>                    | <b>87.2 ± 1.5</b>     | <b>75.0 ± 1.4</b>       |
| <b>Immunoaffinity</b>         | -                     | -                       |

medRxiv preprint doi: <https://doi.org/10.1101/2022.04.12.22278619>; this version posted April 16, 2022. The copyright holder for this preprint (which was not certified by peer review) is the author/funder, who has granted medRxiv a license to display the preprint in perpetuity. All rights reserved. No reuse allowed without permission.

**Table 2**

|                                                 | <b>Average ± SD</b>    |
|-------------------------------------------------|------------------------|
| <b>Age</b>                                      | <b>67.0 ± 11.4</b>     |
| <b>Sex (male/female)</b>                        | <b>6/0</b>             |
| <b>Glucose (mmol/L)</b>                         | <b>5.7 ± 0.5 (N=3)</b> |
| <b>White blood cell count (x10<sup>9</sup>)</b> | <b>7.6 ± 2.2</b>       |
| <b>Troponin (peak ng/L) at presentation</b>     | <b>358.7 ± 401.2</b>   |
| <b>Cholesterol (mmol/L)</b>                     | <b>4.8 ± 1.2</b>       |
| <b>Diabetic status (diabetes / non)</b>         | <b>0/6</b>             |
| <b>Smoker status (smoker / non)</b>             | <b>1/5</b>             |
| <b>Infarct size at 6-months</b>                 | <b>15 ± 7.8</b>        |
| <b>LVEF at follow up (%)</b>                    | <b>47 ± 5.0</b>        |

medRxiv preprint doi: <https://doi.org/10.1101/2022.04.12.22273619>; this version posted April 16, 2022. The copyright holder for this preprint (which was not certified by peer review) is the author/funder, who has granted medRxiv a license to display the preprint in perpetuity. All rights reserved. No reuse allowed without permission.
